# Supplementary material
Source: PubMed Central journal article supplement (PMC7826004)
Supplement: mmc1.pdf [file mmc1.pdf]

Supplemental Table. Laboratory Testing Results in COVID-19–Associated Pernio<sup>a</sup>

| Source article                           | Patient characteristics |            |                | SARS-CoV-2 test      |                    | Skin involvement   |                            | Laboratory testing |                                                                   | Severity of COVID-19 symptoms, n/N |
|------------------------------------------|-------------------------|------------|----------------|----------------------|--------------------|--------------------|----------------------------|--------------------|-------------------------------------------------------------------|------------------------------------|
|                                          | Number with pernio, n/N | Age, years | Sex, M, F, n/N | Naso-pharynx PCR n/N | Serum Antibody n/N | Sites, n/N         | Biopsy results, n/N        | Positive, n/N      | Negative, n/N                                                     |                                    |
| <b>Kolivras et al,<sup>1</sup> 2020</b>  | 1/1                     | 23         | 1/1 M          | 1/1 positive         | Not done           | 1/1 feet, toes     | 1/1 consistent with pernio | 0/1                | 1/1 CBC, ESR, PT, aPTT, thrombin time, D-dimer, ANA, EBV serology | 1/1 mild                           |
| <b>Alramthan et al,<sup>2</sup> 2020</b> | 2/2                     | 27, 35     | 2/2 F          | 2/2 positive         | Not done           | 2/2 hands, fingers | Not done                   | 0/2                | 2/2 CBC, CMP                                                      | 2/2 asymptomatic                   |

|                                          | Patient characteristics |                                               |                  | SARS-CoV-2 test                   |                    | Skin involvement                                                      |                            | Laboratory testing     |                                          |                                                                          |
|------------------------------------------|-------------------------|-----------------------------------------------|------------------|-----------------------------------|--------------------|-----------------------------------------------------------------------|----------------------------|------------------------|------------------------------------------|--------------------------------------------------------------------------|
| Source article                           | Number with pernio, n/N | Age, years                                    | Sex, M, F, n/N   | Naso-pharynx PCR n/N              | Serum Antibody n/N | Sites, n/N                                                            | Biopsy results, n/N        | Positive, n/N          | Negative, n/N                            | Severity of COVID-19 symptoms, n/N                                       |
| <b>Estébanez et al,<sup>3</sup> 2020</b> | 1/1                     | 28                                            | 1/1 F            | 1/1 positive (test not specified) | Not done           | 1/1 feet, heels                                                       | Not done                   | Not done               | Not done                                 | 1/1 mild                                                                 |
| <b>Romani et al,<sup>4</sup> 2020</b>    | 12/12                   | 43, 46, 12, 14, 7, 15, 12, 14, 14, 17, 11, 17 | 4/12 M<br>8/12 F | 0/12 positive                     | 0/5 positive       | 1/12 hands, 1/12 fingers, 4/12 hands and feet, 2/12 ankles, 4/12 feet | 2/2 consistent with pernio | 1/10 elevated ferritin | 10/10 CBC, D-dimer, LDH<br>9/10 ferritin | 12/12 asymptomatic                                                       |
| <b>Landa et al,<sup>5</sup> 2020</b>     | 6/6                     | 15, 15, 23, 44, 91, 24                        | 3/6 M<br>3/6 F   | 2/3 positive                      | 0/1 positive       | 4/6 toes, 1/6 toes and heel, 1/6 fingers and heel                     | Not done                   | Not done               | Not done                                 | 2/6 asymptomatic<br>3/6 mild<br>1/6 moderate-severe (hospitalized prior) |

|                                           | Patient characteristics |                                               |                    | SARS-CoV-2 test                     |                    | Skin involvement                                  |                                                                                                                         | Laboratory testing             |                                                      |                                                                     |
|-------------------------------------------|-------------------------|-----------------------------------------------|--------------------|-------------------------------------|--------------------|---------------------------------------------------|-------------------------------------------------------------------------------------------------------------------------|--------------------------------|------------------------------------------------------|---------------------------------------------------------------------|
| Source article                            | Number with pernio, n/N | Age, years                                    | Sex, M, F, n/N     | Naso-pharynx PCR n/N                | Serum Antibody n/N | Sites, n/N                                        | Biopsy results, n/N                                                                                                     | Positive, n/N                  | Negative, n/N                                        | Severity of COVID-19 symptoms, n/N                                  |
| <b>Piccolo et al, <sup>6</sup> 2020</b>   | 63/63                   | Median 14                                     | 30/63 M<br>33/63 F | 2/11 positive                       | 2/6 positive       | 54/63 feet,<br>5/63 feet and hands,<br>4/63 hands | Not done                                                                                                                | 1/10 Mycoplasma<br><br>1/6 ANA | Serology for other infections                        | 7/63 GI symptoms<br><br>5/63 respiratory symptoms<br><br>3/63 fever |
| <b>Recalcati et al, <sup>7</sup> 2020</b> | 14/14                   | 11 children (mean 14.4)<br>3 adults (mean 29) | 6/14 M<br>8/14 F   | 0/3 positive<br>0/2 rectal positive | Not done           | 8/14 feet,<br>4/14 hands,<br>2/14 feet and hands  | 2/2 acral biopsies consistent with pernio<br><br>2/2 elbow biopsies of targetoid lesions showed perivascular dermatitis | 0/14                           | 14/14 CBC, CRP, LDH, D-dimer, other viral serologies | 11/14 asymptomatic<br><br>3/14 mild (3 weeks prior)                 |

| Source article                                 | Patient characteristics                       |            |                      | SARS-CoV-2 test      |                    | Skin involvement                                                         |                     | Laboratory testing |               | Severity of COVID-19 symptoms, n/N                                                          |
|------------------------------------------------|-----------------------------------------------|------------|----------------------|----------------------|--------------------|--------------------------------------------------------------------------|---------------------|--------------------|---------------|---------------------------------------------------------------------------------------------|
|                                                | Number with pernio, n/N                       | Age, years | Sex, M, F, n/N       | Naso-pharynx PCR n/N | Serum Antibody n/N | Sites, n/N                                                               | Biopsy results, n/N | Positive, n/N      | Negative, n/N |                                                                                             |
| <b>Fernandez-Nieto et al,<sup>8</sup> 2020</b> | 132/346                                       | Mean 19.9  | 71/132 M<br>61/132 F | 2/11 positive        | Not done           | 41/132 hands, 108/132 feet, 120/132 on digits, 22/132 on heels or wrists | Not done            | Not reported       | Not reported  | 113/132 asymptomatic<br>19/132 mild                                                         |
| <b>Docampo-Simón et al,<sup>9</sup> 2020</b>   | 42 chilblains-like/58 with acral skin lesions | Median 14  | 29/58 M<br>29/58 F   | 1/39 positive        | 0/2 positive       | 9/58 hands, 36/58 feet, 13 hands and feet                                | Not done            | Not reported       | Not reported  | 41/58 asymptomatic<br>10/58 mild<br>1/58 severe, with vascular ulcer on toe<br>6/58 unknown |

| Source article                               | Patient characteristics |            |                    | SARS-CoV-2 test                            |                    | Skin involvement                                    |                            | Laboratory testing    |                                                                                                | Severity of COVID-19 symptoms, n/N                                                                                                                  |
|----------------------------------------------|-------------------------|------------|--------------------|--------------------------------------------|--------------------|-----------------------------------------------------|----------------------------|-----------------------|------------------------------------------------------------------------------------------------|-----------------------------------------------------------------------------------------------------------------------------------------------------|
|                                              | Number with pernio, n/N | Age, years | Sex, M, F, n/N     | Naso-pharynx PCR n/N                       | Serum Antibody n/N | Sites, n/N                                          | Biopsy results, n/N        | Positive, n/N         | Negative, n/N                                                                                  |                                                                                                                                                     |
| <b>Galván Casas et al,<sup>10</sup> 2020</b> | 71/375                  | Mean 21.8  | 23/71 M<br>48/71 F | 29/71 positive<br><br>(test not specified) | Not done           | Not specified                                       | Not done                   | Not reported          | Not reported                                                                                   | 37/71 cough<br>18/71 dyspnea<br>44/71 fever<br>27/71 headache<br>17/71 GI<br>10/71 pneumonia<br>9/71 hospitalized<br>2/71 ventilated<br>0/71 deaths |
| <b>Andina et al,<sup>11</sup> 2020</b>       | 22/22                   | Median 12  | 13/22 M<br>9/22 F  | 1/19 positive                              | Not done           | 19/22 feet, heels, toes<br>3/22 feet, toes, fingers | 6/6 consistent with pernio | 1/16 elevated D-dimer | 18/18 PT, fibrinogen, aPTT<br>15/16 D-dimer<br>10/10 CBC<br>4/4 LDH<br>1/1 lupus anticoagulant | 12/22 asymptomatic<br><br>10/22 mild (respiratory and/or GI)                                                                                        |

|                                         | Patient characteristics           |                              |                            | SARS-CoV-2 test                                              |                                                  | Skin involvement                                                               |                            | Laboratory testing                                |                                                                            |                                                                                               |
|-----------------------------------------|-----------------------------------|------------------------------|----------------------------|--------------------------------------------------------------|--------------------------------------------------|--------------------------------------------------------------------------------|----------------------------|---------------------------------------------------|----------------------------------------------------------------------------|-----------------------------------------------------------------------------------------------|
| Source article                          | Number with pernio, n/N           | Age, years                   | Sex, M, F, n/N             | Naso-pharynx PCR n/N                                         | Serum Antibody n/N                               | Sites, n/N                                                                     | Biopsy results, n/N        | Positive, n/N                                     | Negative, n/N                                                              | Severity of COVID-19 symptoms, n/N                                                            |
| <b>Cordoro et al,<sup>12</sup> 2020</b> | 6/6<br><br>Additional 24 patients | Ages 12-17<br><br>Ages 10-19 | 5/6 M<br>1/6 F             | 0/6 positive<br><br>0/13 positive (additional cases in area) | 0/6 positive                                     | 6/6 feet, toes<br><br>3/6 livedo reticularis                                   | 6/6 consistent with pernio | 1/6 ASO positive<br>3/6 mildly reduced fibrinogen | 6/6 CBC, CMP autoimmune serology, coagulopathy panel, inflammatory markers | 4/6 asymptomatic<br><br>2/6 mild                                                              |
| <b>Freeman et al,<sup>13</sup> 2020</b> | 318/505                           | Median 25                    | 163/318 M<br><br>155/318 F | 14/60 positive                                               | 6/20 positive<br><br>4 positive by unknown assay | 298/318 feet<br>48/318 hands<br>Feet only 84%,<br>Hands only 5.1%,<br>Both 10% | 7/7 consistent with pernio | Not reported                                      | Not reported                                                               | 174/318 asymptomatic<br><br>138/318 mild<br><br>6/318 severe (hospitalized) with 2/318 deaths |

| Source article                            | Patient characteristics                                                |            |                            | SARS-CoV-2 test                                                  |                    | Skin involvement                       |                                                                     | Laboratory testing |                                                                                                                       | Severity of COVID-19 symptoms, n/N                                                                      |
|-------------------------------------------|------------------------------------------------------------------------|------------|----------------------------|------------------------------------------------------------------|--------------------|----------------------------------------|---------------------------------------------------------------------|--------------------|-----------------------------------------------------------------------------------------------------------------------|---------------------------------------------------------------------------------------------------------|
|                                           | Number with pernio, n/N                                                | Age, years | Sex, M, F, n/N             | Naso-pharynx PCR n/N                                             | Serum Antibody n/N | Sites, n/N                             | Biopsy results, n/N                                                 | Positive, n/N      | Negative, n/N                                                                                                         |                                                                                                         |
| <b>De Masson et al,<sup>14</sup> 2020</b> | 142 acral/277<br><br>106 chilblain-like, 20 dyshidrosis-like, 16 other | Median 27  | 67/132 M<br><br>65/132 F   | 25/34 positive the of 277<br><br>7/25 positive had acral lesions | Not done           | 23/34 hands<br>18/34 feet              | 3/3 consistent with pernio                                          | Not reported       | Not reported                                                                                                          | 174/277 asymptomatic<br><br>103/277 with mild symptoms<br><br>59/106 asymptomatic (isolated chilblains) |
| <b>Kanitakis et al,<sup>15</sup> 2020</b> | 17/17                                                                  | mean 32    | M 11<br><br>F 7<br># error | 0/17 positive                                                    | 0/17 positive      | 9/17 toes<br>6/17 feet<br>2/17 fingers | 17/17 consistent with pernio<br><br>0/3 PCR positive for SARS-CoV-2 | 0/17               | 17/17 Routine blood tests, inflammatory markers, D-dimer, ANA, complement, cryoglobulins, antiphospholipid antibodies | 12/17 asymptomatic<br><br>5/17 mild                                                                     |

|                                           | Patient characteristics |            |                | SARS-CoV-2 test      |                    | Skin involvement  |                        | Laboratory testing |                                                                                         |                                    |
|-------------------------------------------|-------------------------|------------|----------------|----------------------|--------------------|-------------------|------------------------|--------------------|-----------------------------------------------------------------------------------------|------------------------------------|
| Source article                            | Number with pernio, n/N | Age, years | Sex, M, F, n/N | Naso-pharynx PCR n/N | Serum Antibody n/N | Sites, n/N        | Biopsy results, n/N    | Positive, n/N      | Negative, n/N                                                                           | Severity of COVID-19 symptoms, n/N |
| <b>Kerber et al,<sup>16</sup> 2020</b>    | 1/1                     | 7          | 1/1 M          | 0/1 positive         | 1/1 positive       | 1/1 toes, feet    | Not done               | 0/1                | 1/1 CBC, ESR, CMP, EBV serology                                                         | 1/1 asymptomatic                   |
| <b>Locatelli et al,<sup>17</sup> 2020</b> | 1/1                     | 16         | 1/1 M          | 1/1 positive         | Not done           | 1/1 fingers, toes | Consistent with pernio | 0/1                | 1/1 Routine blood tests, coagulation, autoimmune, cryoglobulins, other viral serologies | 1/1 mild                           |



| Source article                               | Patient characteristics |              |                   | SARS-CoV-2 test      |                    | Skin involvement                      |                                                                                                                       | Laboratory testing                                 |                                      | Severity of COVID-19 symptoms, n/N                       |
|----------------------------------------------|-------------------------|--------------|-------------------|----------------------|--------------------|---------------------------------------|-----------------------------------------------------------------------------------------------------------------------|----------------------------------------------------|--------------------------------------|----------------------------------------------------------|
|                                              | Number with pernio, n/N | Age, years   | Sex, M, F, n/N    | Naso-pharynx PCR n/N | Serum Antibody n/N | Sites, n/N                            | Biopsy results, n/N                                                                                                   | Positive, n/N                                      | Negative, n/N                        |                                                          |
| <b>Suarez-Valle et al,<sup>18</sup> 2020</b> | 3/3 acro-ischemia       | Not reported | Not reported      | 3/3 positive         | Not done           | 3/3 toes<br>1/3 soles                 | Ischemic necrosis of epidermis and dermis with signs of re-epithelialization. Vasculitis or microthrombi not observed | D-dimer elevated<br>3/3 fibrinogen elevated<br>2/3 | 3/3 other coagulation studies normal | 3/3 hospitalized with bilateral pneumonia, and recovered |
| <b>Garcia-Lara et al,<sup>19</sup> 2020</b>  | 27/27                   | Mean 14.4    | 18/27 M<br>9/27 F | 0/2 positive         | 0/9 positive       | 20/27 feet<br>6/27 hands<br>1/27 both | Not done                                                                                                              | Not reported                                       | Not reported                         | 26/27 asymptomatic<br><br>1/27 mild, with diarrhea       |

|                                                  | Patient characteristics |              |                      | SARS-CoV-2 test      |                    | Skin involvement            |                            | Laboratory testing                                                   |                                                                                                                |                                           |
|--------------------------------------------------|-------------------------|--------------|----------------------|----------------------|--------------------|-----------------------------|----------------------------|----------------------------------------------------------------------|----------------------------------------------------------------------------------------------------------------|-------------------------------------------|
| Source article                                   | Number with pernio, n/N | Age, years   | Sex, M, F, n/N       | Naso-pharynx PCR n/N | Serum Antibody n/N | Sites, n/N                  | Biopsy results, n/N        | Positive, n/N                                                        | Negative, n/N                                                                                                  | Severity of COVID-19 symptoms, n/N        |
| <b>Colonna, Monzani et al,<sup>20</sup> 2020</b> | 4/4                     | 11, 11, 6, 5 | 1/4 M<br>3/4 F       | 0/4 positive         | Not done           | 4/4 feet, toes<br>1/4 hands | 1/1 consistent with pernio | 1/4 mild thrombocytosis and monocyto-<br>sis<br>1/4 elevated D-Dimer | 3/4 blood count, 4/4 CRP, coagulation profile, fibrinogen, antiphospholipid antibodies, other viral serologies | 4/4 mild                                  |
| <b>Ruggiero et al,<sup>21</sup> 2020</b>         | 100/100                 | Mean 12.5    | 64/100 M<br>36/100 F | 1/11 positive        | Not done           | 75/100 feet<br>25/100 hands | Not done                   | Not reported                                                         | Not reported                                                                                                   | 84/100 asymptomatic<br>16/100 symptomatic |

|                                          | Patient characteristics |            |                       | SARS-CoV-2 test      |                    | Skin involvement                             |                                                                   | Laboratory testing |                                                                                               |                                    |
|------------------------------------------|-------------------------|------------|-----------------------|----------------------|--------------------|----------------------------------------------|-------------------------------------------------------------------|--------------------|-----------------------------------------------------------------------------------------------|------------------------------------|
| Source article                           | Number with pernio, n/N | Age, years | Sex, M, F, n/N        | Naso-pharynx PCR n/N | Serum Antibody n/N | Sites, n/N                                   | Biopsy results, n/N                                               | Positive, n/N      | Negative, n/N                                                                                 | Severity of COVID-19 symptoms, n/N |
| <b>Mahieu et al,<sup>22</sup> 2020</b>   | 10/10                   | Median 27  | Not reported          | 0/10 positive        | 0/10 positive      | 9/10 feet, toes<br>2/10 fingers<br>1/10 sole | 3/3 consistent with pernio<br><br>0/4 PCR positive for SARS-CoV-2 | 0/10               | 10/10 CBC, CRP, immunoglobulin levels, cryoglobulins, complement, antiphospholipid antibodies | 8/10 asymptomatic<br><br>2/10 mild |
| <b>Guarneri et al,<sup>23</sup> 2020</b> | 23/23                   | Mean 14.3  | 9/23 M<br><br>14/23 F | 6/23 positive        | Not done           | Not reported                                 | Not done                                                          | Not reported       | Not reported                                                                                  | Not reported                       |

|                                           | Patient characteristics |            |                   | SARS-CoV-2 test      |                                                                                                                                                             | Skin involvement                        |                                                                     | Laboratory testing |                                                                                                                                                                                                            |                                                                               |
|-------------------------------------------|-------------------------|------------|-------------------|----------------------|-------------------------------------------------------------------------------------------------------------------------------------------------------------|-----------------------------------------|---------------------------------------------------------------------|--------------------|------------------------------------------------------------------------------------------------------------------------------------------------------------------------------------------------------------|-------------------------------------------------------------------------------|
| Source article                            | Number with pernio, n/N | Age, years | Sex, M, F, n/N    | Naso-pharynx PCR n/N | Serum Antibody n/N                                                                                                                                          | Sites, n/N                              | Biopsy results, n/N                                                 | Positive, n/N      | Negative, n/N                                                                                                                                                                                              | Severity of COVID-19 symptoms, n/N                                            |
| <b>EI Hachem et al,<sup>24</sup> 2020</b> | 19/19                   | Mean 14    | 14/19 M<br>5/19 F | 0/19 positive        | 0/19 positive for IgG to nucleocapsid protein<br><br>1/19 positive IgG to S1 domain of spike protein<br><br>6/19 positive IgA to S1 domain of spike protein | 19/19 toes<br>10/19 heels<br>8/19 soles | 18/18 consistent with pernio<br><br>0/3 PCR positive for SARS-CoV-2 | 0/19               | 19/19 CBC, ESR, cryoglobulins, autoantibodies (ANCA, ANA, anti-dsDNA, ENA, antiphospholipid antibodies) C3, C4, immunoglobulins (IgG, IgM, IgA), and coagulation screening (D-Dimer, PT, aPTT, fibrinogen) | 13/19 asymptomatic<br><br>6/19 mild symptoms (5 respiratory prior, 1 GI post) |

| Source article                            | Patient characteristics |                            |                | SARS-CoV-2 test                                                           |                    | Skin involvement                                       |                                                                                    | Laboratory testing             |                                                                                                                         | Severity of COVID-19 symptoms, n/N |
|-------------------------------------------|-------------------------|----------------------------|----------------|---------------------------------------------------------------------------|--------------------|--------------------------------------------------------|------------------------------------------------------------------------------------|--------------------------------|-------------------------------------------------------------------------------------------------------------------------|------------------------------------|
|                                           | Number with pernio, n/N | Age, years                 | Sex, M, F, n/N | Naso-pharynx PCR n/N                                                      | Serum Antibody n/N | Sites, n/N                                             | Biopsy results, n/N                                                                | Positive, n/N                  | Negative, n/N                                                                                                           |                                    |
| <b>Colmenero et al,<sup>25</sup> 2020</b> | 7/7                     | 11, 13, 14, 15, 15, 15, 17 | 4/7 M<br>3/7 F | 0/6 positive                                                              | None               | 6/7 feet only<br><br>1/7 feet and hands                | 7/7 consistent with pernio<br><br>7/7 positive for SARS-CoV-2 spike protein by IHC | 1/6 D-dimer minimally elevated | 6/6 CBC, coagulation studies                                                                                            | 2/7 asymptomatic<br><br>5/7 mild   |
| <b>Iria et al,<sup>26</sup> 2020</b>      | 8/8                     | Mean 12.8                  | 3/8 M<br>5/8 F | 0/8 positive<br><br>(excluded anyone that tested positive for SARS-CoV-2) | 0/8 positive       | 8/8 toes<br><br>3/8 soles and heels<br><br>3/8 fingers | 2/2 consistent with pernio<br><br>0/1 PCR positive for SARS-CoV-2                  | 3/8 slight lymphocytosis       | 5/8 CBC<br><br>8/8 LDH, ferritin, CRP, ANA anti-phospholipid antibodies, PT/INR, aPTT, fibrinogen, D-dimer, other viral | 8/8 asymptomatic                   |

|                                                   | Patient characteristics |                              |                | SARS-CoV-2 test      |                    | Skin involvement |                     | Laboratory testing                                       |               |                                                                   |
|---------------------------------------------------|-------------------------|------------------------------|----------------|----------------------|--------------------|------------------|---------------------|----------------------------------------------------------|---------------|-------------------------------------------------------------------|
| Source article                                    | Number with pernio, n/N | Age, years                   | Sex, M, F, n/N | Naso-pharynx PCR n/N | Serum Antibody n/N | Sites, n/N       | Biopsy results, n/N | Positive, n/N                                            | Negative, n/N | Severity of COVID-19 symptoms, n/N                                |
|                                                   |                         |                              |                |                      |                    |                  |                     |                                                          | serologies    |                                                                   |
| <b>Colonna, Spinelli et al,<sup>27</sup> 2020</b> | 45/45                   | Pediatric, ages not reported | Not reported   | 0/45 positive        | 1/8 positive (IgG) | Feet most common | Not reported        | 2/8 elevated D-dimer and fibrinogen degradation products | Not reported  | A personal or family history of mild symptoms frequently reported |

|                                            | Patient characteristics |            |                   | SARS-CoV-2 test      |                               | Skin involvement                                   |                            | Laboratory testing |                                                                                                                                                                |                                    |
|--------------------------------------------|-------------------------|------------|-------------------|----------------------|-------------------------------|----------------------------------------------------|----------------------------|--------------------|----------------------------------------------------------------------------------------------------------------------------------------------------------------|------------------------------------|
| Source article                             | Number with pernio, n/N | Age, years | Sex, M, F, n/N    | Naso-pharynx PCR n/N | Serum Antibody n/N            | Sites, n/N                                         | Biopsy results, n/N        | Positive, n/N      | Negative, n/N                                                                                                                                                  | Severity of COVID-19 symptoms, n/N |
| <b>Roca-Ginés et al,<sup>28</sup> 2020</b> | 20/20                   | Mean 12.3  | 13/20 M<br>7/20 F | 0/20 positive        | 0/20 positive (IgG, IgM, IgA) | 14/20 feet only<br>2/20 hand only<br>4 hand & feet | 6/6 consistent with pernio | 2/20 positive ANA  | 18/20 ANA<br>20/20 CBC, CMP, ESR, ferritin, LDH, CRP, D-dimer, cryoglobulins, protein C & S, ANCA, antiphospholipid antibodies, C3, C4, other viral serologies | 20/20 asymptomatic                 |

| Source article                         | Patient characteristics |            |                    | SARS-CoV-2 test      |                          | Skin involvement                                           |                                                                  | Laboratory testing |                                                                                                                                            | Severity of COVID-19 symptoms, n/N                                     |
|----------------------------------------|-------------------------|------------|--------------------|----------------------|--------------------------|------------------------------------------------------------|------------------------------------------------------------------|--------------------|--------------------------------------------------------------------------------------------------------------------------------------------|------------------------------------------------------------------------|
|                                        | Number with pernio, n/N | Age, years | Sex, M, F, n/N     | Naso-pharynx PCR n/N | Serum Antibody n/N       | Sites, n/N                                                 | Biopsy results, n/N                                              | Positive, n/N      | Negative, n/N                                                                                                                              |                                                                        |
| <b>Herman et al,<sup>29</sup> 2020</b> | 31/31                   | Median 22  | 12/31 M<br>19/31 F | 0/31 positive        | 0/31 positive (IgM, IgG) | 27/31 feet only,<br>3/31 hands and feet,<br>1/31 hand only | 22/22 consistent with pernio<br>0/22 PCR positive for SARS-CoV-2 | 8/31 ANA           | 23/31 ANA<br>31/31 RF, CH50, C3, C4, ANCA, ASO, cold agglutinins, PT, aPTT, D-Dimer, antiphospholipid antibodies, cryoglobulins, CRP, SPEP | 10/31 asymptomatic<br>20/31 mild symptoms<br>1/31 unspecified severity |



|                                             | Patient characteristics |            |                    | SARS-CoV-2 test      |                                                         | Skin involvement               |                                                                                                            | Laboratory testing                                                                                                                                |                              |                                               |
|---------------------------------------------|-------------------------|------------|--------------------|----------------------|---------------------------------------------------------|--------------------------------|------------------------------------------------------------------------------------------------------------|---------------------------------------------------------------------------------------------------------------------------------------------------|------------------------------|-----------------------------------------------|
| Source article                              | Number with pernio, n/N | Age, years | Sex, M, F, n/N     | Naso-pharynx PCR n/N | Serum Antibody n/N                                      | Sites, n/N                     | Biopsy results, n/N                                                                                        | Positive, n/N                                                                                                                                     | Negative, n/N                | Severity of COVID-19 symptoms, n/N            |
| <b>Hubiche et al,<sup>30, 31</sup> 2020</b> | 40/40                   | Median 22  | 19/40 M<br>21/40 F | 0/26 positive        | 12/40 positive (7 IgA, 3 IgG, 1 IgM & IgG, 1 IgA & IgG) | Toes, rarely heels and fingers | 19/19 consistent with pernio<br><br>Direct immunofluorescence with granular C3 of papillary dermal vessels | 24/40 elevated D-Dimer<br><br>9/40 positive ANA<br><br>4/40 positive antiphospholipid antibodies<br><br>IFN- $\alpha$ increased after stimulation | 25/25 negative cryoglobulins | 25/40 asymptomatic<br><br>15/40 mild symptoms |

|                                                       | Patient characteristics |            |                    | SARS-CoV-2 test                                                            |                                                | Skin involvement |                                                                                    | Laboratory testing                                                                          |                                         |                                                   |
|-------------------------------------------------------|-------------------------|------------|--------------------|----------------------------------------------------------------------------|------------------------------------------------|------------------|------------------------------------------------------------------------------------|---------------------------------------------------------------------------------------------|-----------------------------------------|---------------------------------------------------|
| Source article                                        | Number with pernio, n/N | Age, years | Sex, M, F, n/N     | Naso-pharynx PCR n/N                                                       | Serum Antibody n/N                             | Sites, n/N       | Biopsy results, n/N                                                                | Positive, n/N                                                                               | Negative, n/N                           | Severity of COVID-19 symptoms, n/N                |
| <b>García-Legaz Martínez et al,<sup>32</sup> 2020</b> | 19 acral /26            | Mean 28    | 14/26 M<br>12/26 F | 2/19 positive prior to onset of rash<br><br>0/19 positive at onset of rash | 3/19 positive (2 with IgG<br>1 with IgG & IgA) | Not specified    | 1/1 consistent with pernio                                                         | 1/19 HHV-6 nasopharyngeal,<br>1/19 Parvovirus B19 serum<br><br>Both of unknown significance | Parvovirus B19, measles, rubella, HHV-6 | 17/19 asymptomatic<br><br>2/19 mild (prior fever) |
| <b>Santonja et al,<sup>33</sup> 2020</b>              | 1/1                     | 35         | 1/1 F              | 0/1 positive                                                               | 0/1 positive (IgG, IgM)                        | 1/1 feet, toes   | 1/1 consistent with pernio<br><br>1/1 positive for SARS-CoV-2 spike protein by IHC | Not reported                                                                                | Not reported                            | 1/1 mild (2 days fever and cough)                 |

| Source article                                    | Patient characteristics |            |                        | SARS-CoV-2 test      |                    | Skin involvement                                          |                                                                   | Laboratory testing |                                                                                                       | Severity of COVID-19 symptoms, n/N   |
|---------------------------------------------------|-------------------------|------------|------------------------|----------------------|--------------------|-----------------------------------------------------------|-------------------------------------------------------------------|--------------------|-------------------------------------------------------------------------------------------------------|--------------------------------------|
|                                                   | Number with pernio, n/N | Age, years | Sex, M, F, n/N         | Naso-pharynx PCR n/N | Serum Antibody n/N | Sites, n/N                                                | Biopsy results, n/N                                               | Positive, n/N      | Negative, n/N                                                                                         |                                      |
| <b>Rouanet et al,<sup>34</sup> 2020</b>           | 10/10                   | Median 33  | 5/10 M<br>5/10 F       | 0/7 positive         | 0/9 positive (IgG) | 3 fingers<br>1 both fingers and toes<br>6 toes            | 9/9 consistent with pernio<br><br>0/9 PCR positive for SARS-CoV-2 | 3/10 positive ANA  | 7/10 ANA<br><br>10/10 CBC, CRP, complement, ANCA, cryoglobulins, D-dimer, antiphospholipid antibodies | 5/10 asymptomatic<br><br>5/10 mild   |
| <b>Colonna, Genovese et al,<sup>35</sup> 2020</b> | 30/30                   | Median 11  | 17/30 M<br><br>13/30 F | 0/6 positive         | Not done           | 27/30 feet only<br>2/30 hands only<br>1/30 hands and feet | 2/2 consistent with pernio                                        | Not reported       | Not reported                                                                                          | 17/30 asymptomatic<br><br>13/30 mild |

|                                               | Patient characteristics |            |                    | SARS-CoV-2 test      |                    | Skin involvement                        |                                                                      | Laboratory testing              |                                                                                                                                |                                      |
|-----------------------------------------------|-------------------------|------------|--------------------|----------------------|--------------------|-----------------------------------------|----------------------------------------------------------------------|---------------------------------|--------------------------------------------------------------------------------------------------------------------------------|--------------------------------------|
| Source article                                | Number with pernio, n/N | Age, years | Sex, M, F, n/N     | Naso-pharynx PCR n/N | Serum Antibody n/N | Sites, n/N                              | Biopsy results, n/N                                                  | Positive, n/N                   | Negative, n/N                                                                                                                  | Severity of COVID-19 symptoms, n/N   |
| <b>Torres-Navaro et al,<sup>36</sup> 2020</b> | 2/2                     | 16, 16     | 1/2 M<br>1/2 F     | 0/2 positive         | Not done           | 2/2 hands, fingers                      | Not done                                                             | 0/2                             | 2/2 CBC, ESR, CMP, ANA, C3, C4, antiphospholipid antibodies, cold agglutinins, other viral serologies, levels of IgG, IgM, IgA | 2/2 asymptomatic                     |
| <b>Lesort et. al,<sup>37</sup> 2020</b>       | 45/45                   | Mean 30.1  | 26/45 M<br>19/45 F | 0/17 positive        | 0/17 positive      | 37/45 toes<br>2/45 fingers<br>6/45 both | 17/17 consistent with pernio<br><br>0/11 PCR positive for SARS-CoV-2 | 6/15 increased interferon score | 17/17 CBC, inflammatory markers<br>autoimmune markers, D-dimer                                                                 | 33/45 asymptomatic<br><br>12/45 mild |

| Source article                           | Patient characteristics |                                                         |                      | SARS-CoV-2 test      |                     | Skin involvement                                                      |                     | Laboratory testing |                            | Severity of COVID-19 symptoms, n/N              |
|------------------------------------------|-------------------------|---------------------------------------------------------|----------------------|----------------------|---------------------|-----------------------------------------------------------------------|---------------------|--------------------|----------------------------|-------------------------------------------------|
|                                          | Number with pernio, n/N | Age, years                                              | Sex, M, F, n/N       | Naso-pharynx PCR n/N | Serum Antibody n/N  | Sites, n/N                                                            | Biopsy results, n/N | Positive, n/N      | Negative, n/N              |                                                 |
| <b>Rizzoli et. al,<sup>38</sup> 2020</b> | 16/16                   | 9,11,1<br>2,12,1<br>2,12,1<br>4,15,1<br>5,15,<br>16, 19 | 4/12 M<br><br>8/12 F | 0/16 positive        | 1/12 positive (IgG) | 9/12 feet only<br><br>2/12 hands only<br><br>1/12 both hands and feet | Not done            | 0/4                | 4/4 other viral serologies | Not reported                                    |
| <b>Das et al,<sup>39</sup> 2020</b>      | 5/5                     | 27, 29,<br>32, 45,<br>52                                | Not reported         | 5/5 positive         | Not done            | 4/5 toes<br>1/5 fingers                                               | Not done            | Not reported       | Not reported               | 5/5 in COVID isolation ward, with mild symptoms |

|                                            | Patient characteristics |              |                | SARS-CoV-2 test      |                    | Skin involvement  |                            | Laboratory testing                                                      |                                                                                               |                                    |
|--------------------------------------------|-------------------------|--------------|----------------|----------------------|--------------------|-------------------|----------------------------|-------------------------------------------------------------------------|-----------------------------------------------------------------------------------------------|------------------------------------|
| Source article                             | Number with pernio, n/N | Age, years   | Sex, M, F, n/N | Naso-pharynx PCR n/N | Serum Antibody n/N | Sites, n/N        | Biopsy results, n/N        | Positive, n/N                                                           | Negative, n/N                                                                                 | Severity of COVID-19 symptoms, n/N |
| <b>Valtueña et al,<sup>40</sup> 2020</b>   | 8/8 acral edema         | Not reported | Not reported   | Not reported         | Not reported       | 8/8 feet or hands | Consistent with pernio     | 0/8                                                                     | 8/8 complement, markers of bacterial infection                                                | Mild                               |
| <b>García-Gil et al,<sup>41</sup> 2020</b> | 1/1 acral purpura       | 18           | 1/1 M          | 0/1 positive         | 0/1 positive       | 1/1 feet          | 1/1 consistent with pernio | 1/1 elevated ESR, CRP, INR, D-dimer, PT time, fibrinogen, and monocytes | 1/1 cryoglobulin, cold agglutinins, rheumatoid factor, ANA, complements, other viral serology | 1/1 Mild                           |

| Source article                                     | Patient characteristics |            |                | SARS-CoV-2 test      |                    | Skin involvement |                            | Laboratory testing |                                                                                                          | Severity of COVID-19 symptoms, n/N                                    |
|----------------------------------------------------|-------------------------|------------|----------------|----------------------|--------------------|------------------|----------------------------|--------------------|----------------------------------------------------------------------------------------------------------|-----------------------------------------------------------------------|
|                                                    | Number with pernio, n/N | Age, years | Sex, M, F, n/N | Naso-pharynx PCR n/N | Serum Antibody n/N | Sites, n/N       | Biopsy results, n/N        | Positive, n/N      | Negative, n/N                                                                                            |                                                                       |
| <b>Wargo et al,<sup>42</sup> 2020</b>              | 1/1                     | 49         | 1/1 F          | Not done             | 0/1 positive       | 1/1 feet, toes   | 1/1 consistent with pernio | 0/1                | 1/1 CBC, CMP, PT, aPTT, D-Dimer, fibrinogen, ANA                                                         | 1/1 mild                                                              |
| <b>Quintana-Castanedo et al,<sup>43</sup> 2020</b> | 1/1                     | 11         | 1/1 M          | 0/1 positive         | 1/1 positive (IgG) | 1/1 toes         | Not done                   | 0/1                | 1/1 complement, autoimmune panel, CRP, coagulation studies, cryoglobulins, D-dimer, other viral serology | 1/1 asymptomatic (ophthalmology found retinal vasculitis in left eye) |

| Source article                            | Patient characteristics                       |                |                                    | SARS-CoV-2 test      |                     | Skin involvement                                                   |                                                                                                                          | Laboratory testing                |                                                                                                                               | Severity of COVID-19 symptoms, n/N                                                         |
|-------------------------------------------|-----------------------------------------------|----------------|------------------------------------|----------------------|---------------------|--------------------------------------------------------------------|--------------------------------------------------------------------------------------------------------------------------|-----------------------------------|-------------------------------------------------------------------------------------------------------------------------------|--------------------------------------------------------------------------------------------|
|                                           | Number with pernio, n/N                       | Age, years     | Sex, M, F, n/N                     | Naso-pharynx PCR n/N | Serum Antibody n/N  | Sites, n/N                                                         | Biopsy results, n/N                                                                                                      | Positive, n/N                     | Negative, n/N                                                                                                                 |                                                                                            |
| <b>Battesti et al,<sup>44</sup> 2020</b>  | 7/7                                           | 42 mean        | 3/7 M<br>4/7 F                     | 0/7 positive         | 1/7 positive (IgA)  | 7/7 feet                                                           | 7/7 consistent with pernio<br><br>0/7 PCR positive for SARS-CoV-2<br><br>7/7 positive for myxovirus resistance protein-A | 2 ANCA<br>1 lupus anticoagulant   | 7/7 hematologic, immunologic, antiphospholipid antibodies, cryoproteins, cold agglutinins, other viral serology               | 2/7 asymptomatic<br><br>5/7 mild                                                           |
| <b>Le Cleach et al,<sup>45</sup> 2020</b> | 311 acral/481<br><br>202 classical chilblains | median<br>25.7 | 129/31<br>1 M<br><br>182/31<br>1 F | 7/121 positive       | 5/75 positive (IgG) | 236/311 feet<br><br>36/311 hands<br><br>37/311 both hands and feet | 26/29 consistent with pernio                                                                                             | 12 with immunologic abnormalities | 57/66 CBC, 20/20 CRP, 61/61 aPTT, 14/14 complement, 34/34 cold agglutinins, 30/30 cryofibrinogens, 57/57 other viral serology | 151/311 asymptomatic<br><br>157/311 mild<br><br>3/311 pneumonia<br><br>0/311 ICU or deaths |



|                                         | Patient characteristics                                 |            |                    | SARS-CoV-2 test      |                                                   | Skin involvement          |                            | Laboratory testing |                                                                                                                                            |                                                                    |
|-----------------------------------------|---------------------------------------------------------|------------|--------------------|----------------------|---------------------------------------------------|---------------------------|----------------------------|--------------------|--------------------------------------------------------------------------------------------------------------------------------------------|--------------------------------------------------------------------|
| Source article                          | Number with pernio, n/N                                 | Age, years | Sex, M, F, n/N     | Naso-pharynx PCR n/N | Serum Antibody n/N                                | Sites, n/N                | Biopsy results, n/N        | Positive, n/N      | Negative, n/N                                                                                                                              | Severity of COVID-19 symptoms, n/N                                 |
| <b>Freeman et al,<sup>46</sup> 2020</b> | 31 pernio with laboratory confirmed COVID-19/422 pernio | median 35  | 15/31 M<br>16/31 F | 16/31 positive       | 11/31 positive<br>4 positive on unspecified assay | 26/31 feet<br>10/31 hands | 1 consistent with pernio   | Not reported       | Not reported                                                                                                                               | 6/31 asymptomatic<br>21/31 mild<br>5/31 hospitalized with 2 deaths |
| <b>Ladha et al,<sup>47</sup> 2020</b>   | 1/1                                                     | 16         | 1/1 F              | 0/1 positive         | 1/1 positive                                      | 1/1 toes and finger       | 1/1 consistent with pernio | 0/1                | 1/1 CBC, ANA, ENA, dsDNA, antiphospholipid antibodies, complement, coagulation, D-dimer, cryoglobulins, cryofibrinogens, cold agglutinins, | 1/1 asymptomatic                                                   |

| Source article                                        | Patient characteristics |            |                    | SARS-CoV-2 test      |                                            | Skin involvement            |                                                                                                       | Laboratory testing                                               |                                      | Severity of COVID-19 symptoms, n/N        |
|-------------------------------------------------------|-------------------------|------------|--------------------|----------------------|--------------------------------------------|-----------------------------|-------------------------------------------------------------------------------------------------------|------------------------------------------------------------------|--------------------------------------|-------------------------------------------|
|                                                       | Number with pernio, n/N | Age, years | Sex, M, F, n/N     | Naso-pharynx PCR n/N | Serum Antibody n/N                         | Sites, n/N                  | Biopsy results, n/N                                                                                   | Positive, n/N                                                    | Negative, n/N                        |                                           |
| <b>Rodríguez-Villa Lario et al,<sup>48</sup> 2020</b> | 1/1                     | 17         | 1/1 M              | 0/1 positive         | 1/1 positive (+IgG, -IgM)                  | 1/1 toes                    | 1/1 consistent with pernio                                                                            | 1/1 elevated IgA                                                 | 1/1 CBC, ANA, cryoglobulins, D-dimer | Not reported                              |
| <b>Hébert et al,<sup>49</sup> 2020</b>                | 33/33                   | Mean 23.4  | 19/33 M<br>14/33 F | 0/3 positive         | 1/33 positive (IgM)<br>0/33 positive (IgG) | 33/33 toes<br>12/33 fingers | 5/5 consistent with pernio<br>0/5 IgG positive for anti-SARS-CoV-2<br>0/5 PCR positive for SARS-CoV-2 | 7/33 mild lymphopenia<br>2/33 ANA<br>3/33 type III cryoglobulins | 26/33 CBC<br>33/33 ESR, CRP          | 23/33 asymptomatic<br>10/33 mild symptoms |

|                                         | Patient characteristics                                         |                |                | SARS-CoV-2 test      |                    | Skin involvement      |                                                                                    | Laboratory testing |                                                        |                                           |
|-----------------------------------------|-----------------------------------------------------------------|----------------|----------------|----------------------|--------------------|-----------------------|------------------------------------------------------------------------------------|--------------------|--------------------------------------------------------|-------------------------------------------|
| Source article                          | Number with pernio, n/N                                         | Age, years     | Sex, M, F, n/N | Naso-pharynx PCR n/N | Serum Antibody n/N | Sites, n/N            | Biopsy results, n/N                                                                | Positive, n/N      | Negative, n/N                                          | Severity of COVID-19 symptoms, n/N        |
|                                         |                                                                 |                |                |                      |                    |                       |                                                                                    |                    |                                                        |                                           |
| <b>Torrelo et al,<sup>50</sup> 2020</b> | 4/4 with acral pernio-like and erythema multiforme-like lesions | 11, 12, 15, 17 | 3/4 M<br>1/4 F | 1/4 positive         | Not done           | 4/4 feet<br>4/4 hands | 2/2 consistent with pernio<br><br>1/1 positive for SARS-CoV-2 spike protein by IHC | 0/3                | 2/2 hemogram<br><br>3/3 coagulation<br><br>2/2 D-dimer | 1/4 asymptomatic<br><br>3/4 mild symptoms |

| Source article                            | Patient characteristics                                              |            |                | SARS-CoV-2 test      |                    | Skin involvement        |                                                                                                                             | Laboratory testing |               | Severity of COVID-19 symptoms, n/N        |
|-------------------------------------------|----------------------------------------------------------------------|------------|----------------|----------------------|--------------------|-------------------------|-----------------------------------------------------------------------------------------------------------------------------|--------------------|---------------|-------------------------------------------|
|                                           | Number with pernio, n/N                                              | Age, years | Sex, M, F, n/N | Naso-pharynx PCR n/N | Serum Antibody n/N | Sites, n/N              | Biopsy results, n/N                                                                                                         | Positive, n/N      | Negative, n/N |                                           |
| <b>Aghazadeh et al,<sup>51</sup> 2020</b> | 1/1 with pernio-like acral erythema with oral vesicles and erosion   | 9          | 1/1 F          | 1/1 positive         | Not done           | 1/1 hands and feet      | Not done                                                                                                                    | Not reported       | Not reported  | 1/1 mild symptoms                         |
| <b>Magro et al,<sup>52</sup> 2020</b>     | 3/9 with pernio<br><br>(6/9 with acral livedoid or retiform purpura) | 16, 48, 65 | 1/3 M<br>2/3 F | 0/2 positive         | 0/1 positive       | 2/3 toes<br>1/3 fingers | 3/3 consistent with pernio<br><br>3/3 positive for myxovirus resistance protein-A<br><br>3/3 rare SARS-CoV-2 positive cells | Not reported       | Not reported  | 1/3 asymptomatic<br><br>2/3 mild symptoms |

|                                            | Patient characteristics             |            |                | SARS-CoV-2 test      |                    | Skin involvement |                            | Laboratory testing |                                                                                                                  |                                    |
|--------------------------------------------|-------------------------------------|------------|----------------|----------------------|--------------------|------------------|----------------------------|--------------------|------------------------------------------------------------------------------------------------------------------|------------------------------------|
| Source article                             | Number with pernio, n/N             | Age, years | Sex, M, F, n/N | Naso-pharynx PCR n/N | Serum Antibody n/N | Sites, n/N       | Biopsy results, n/N        | Positive, n/N      | Negative, n/N                                                                                                    | Severity of COVID-19 symptoms, n/N |
| <b>Proietti et al,<sup>53</sup> 2020</b>   | 1/1                                 | 35         | 1/1 F          | 1/1 positive         | Not done           | 1/1 ear          | Not done                   | 0/1                | 1/1 CBC, LDH, CMP, coagulation panel, autoimmune panel                                                           | 1/1 asymptomatic                   |
| <b>García-Gil et al,<sup>54</sup> 2020</b> | 1/1 with acral purpura and blisters | 12         | 1/1 M          | 0/1 positive         | 0/1 positive       | 1/1 feet/heels   | 1/1 consistent with pernio | 0/1                | 1/1 CBC, CMP, coagulation studies, nasopharyngeal swab for other respiratory viruses, serology for other viruses | 1/1 asymptomatic                   |

|                                         | Patient characteristics           |                    |                    | SARS-CoV-2 test     |                    | Skin involvement                                                |                                                                                                                 | Laboratory testing                                     |                                                              |                                                |
|-----------------------------------------|-----------------------------------|--------------------|--------------------|---------------------|--------------------|-----------------------------------------------------------------|-----------------------------------------------------------------------------------------------------------------|--------------------------------------------------------|--------------------------------------------------------------|------------------------------------------------|
| Source article                          | Number with pernio, n/N           | Age, years         | Sex, M, F, n/N     | Nasopharynx PCR n/N | Serum Antibody n/N | Sites, n/N                                                      | Biopsy results, n/N                                                                                             | Positive, n/N                                          | Negative, n/N                                                | Severity of COVID-19 symptoms, n/N             |
| <b>Caselli et al,<sup>55</sup> 2020</b> | 38/38 with acute pseudo-chilblain | Median 13.5        | 22/38 M<br>16/38 F | 0/38 positive       | 0/38 positive      | 38/38 feet or hands                                             | Not done                                                                                                        | 1/38 with positive ANA<br>1/38 positive for mycoplasma | 38/38 nasopharyngeal swab for other viruses and bacteria     | 30/38 asymptomatic<br>8/38 mild symptoms prior |
| <b>Ko et al,<sup>56, 57</sup> 2020</b>  | 5/5                               | 31, 61, 62, 76, 82 | 1/5 M<br>4/5 F     | Not done            | 0/3 positive       | 3/5 finger only<br>1/5 toe only<br>1/5 toe, foot, wrists, knees | 5/5 consistent with pernio<br>0/5 positive for SARS-CoV-2 nucleocapsid protein by IHC<br>3/5 positive for SARS- | 0/5                                                    | 2/2 negative ANA<br>1/1 negative antiphospholipid antibodies | 5/5 asymptomatic                               |

|                                        | Patient characteristics                 |            |                       | SARS-CoV-2 test                                             |                                                   | Skin involvement             |                                                                                        | Laboratory testing                                                     |                                                                                               |                                                       |
|----------------------------------------|-----------------------------------------|------------|-----------------------|-------------------------------------------------------------|---------------------------------------------------|------------------------------|----------------------------------------------------------------------------------------|------------------------------------------------------------------------|-----------------------------------------------------------------------------------------------|-------------------------------------------------------|
| Source article                         | Number with pernio, n/N                 | Age, years | Sex, M, F, n/N        | Naso-pharynx PCR n/N                                        | Serum Antibody n/N                                | Sites, n/N                   | Biopsy results, n/N                                                                    | Positive, n/N                                                          | Negative, n/N                                                                                 | Severity of COVID-19 symptoms, n/N                    |
|                                        |                                         |            |                       |                                                             |                                                   |                              | CoV-2 spike protein by IHC<br><br>0/3 positive for SARS-CoV-2 spike protein by RNA ISH |                                                                        |                                                                                               |                                                       |
| <b>Denina et al,<sup>58</sup> 2020</b> | 24/35 with pernio and serologic testing | Mean 13    | 9/24 M<br><br>15/24 F | 1/17 positive via rectal swab<br><br>0/4 fecal PCR positive | 4/24 positive by ELISA or chemiluminescence assay | 22/24 toes<br><br>2/24 heels | Not done                                                                               | 2/24 positive lupus anticoagulant<br><br>1/24 positive anticardiolipin | 24/24 ANA, cryoglobulins, C3, C4, PT, aPTT, D-Dimer, Fibrinogen, CRP, LDH, ESR, IgA, IgG, IgM | 4/24 fever<br><br>10/24 cough<br><br>5/24 GI symptoms |

| Source article                           | Patient characteristics                                                                                                                |              |                | SARS-CoV-2 test      |                    | Skin involvement  |                                                                                                                  | Laboratory testing |               | Severity of COVID-19 symptoms, n/N                                                            |
|------------------------------------------|----------------------------------------------------------------------------------------------------------------------------------------|--------------|----------------|----------------------|--------------------|-------------------|------------------------------------------------------------------------------------------------------------------|--------------------|---------------|-----------------------------------------------------------------------------------------------|
|                                          | Number with pernio, n/N                                                                                                                | Age, years   | Sex, M, F, n/N | Naso-pharynx PCR n/N | Serum Antibody n/N | Sites, n/N        | Biopsy results, n/N                                                                                              | Positive, n/N      | Negative, n/N |                                                                                               |
| <b>Pangti et al,<sup>59</sup> 2020</b>   | 1 chilblain-like/138 hospitalized COVID-19+ patients                                                                                   | 50           | 1/1 F          | 1/1 positive         | Not done           | Toes of both feet | Not done                                                                                                         | Not reported       | Not reported  | 1/1 Mild<br><br>Lower limb ischemia on doppler ultrasound                                     |
| <b>Gianotti et al,<sup>60</sup> 2020</b> | 5 chilblain-like/20 patients biopsied at risk for COVID-19<br><br>2 chilblain-like/10 patients biopsied with positive PCR for COVID-19 | Not reported | Not reported   | 2/7 positive         | Not done           | Not reported      | 7/7 consistent with pernio<br><br>3/3 positive eccrine gland staining for SARS-CoV-2 nucleocapsid protein by IHC | Not reported       | Not reported  | 2/7 PCR positive with active infection<br><br>5/7 mild symptoms and/or COVID-19 home exposure |



| Source article                          | Patient characteristics                      |                                                                                    |                        | SARS-CoV-2 test      |                    | Skin involvement                                                      |                     | Laboratory testing |               | Severity of COVID-19 symptoms, n/N            |
|-----------------------------------------|----------------------------------------------|------------------------------------------------------------------------------------|------------------------|----------------------|--------------------|-----------------------------------------------------------------------|---------------------|--------------------|---------------|-----------------------------------------------|
|                                         | Number with pernio, n/N                      | Age, years                                                                         | Sex, M, F, n/N         | Naso-pharynx PCR n/N | Serum Antibody n/N | Sites, n/N                                                            | Biopsy results, n/N | Positive, n/N      | Negative, n/N |                                               |
| <b>Stavert et al,<sup>61</sup> 2020</b> | 24 antibody tested/26 consecutive chilblains | 27,30, 27,64, 26,33, 11,12, 41,55, 24,31, 25,31, 19,28, 59,28, 33,31, 32,25, 41,37 | 12/24 M<br><br>12/24 F | 1/21 positive        | 4/24 positive      | 21/24 toes only<br><br>2/24 fingers only<br><br>1/24 toes and fingers | Not done            | Not reported       | Not reported  | 10/24 asymptomatic<br><br>14/24 mild symptoms |
| <b>Mohan et al,<sup>62</sup> 2020</b>   | 1/1                                          | 10                                                                                 | 1/1 M                  | 0/1 positive         | 0/1 positive       | 1/1 toes of both feet                                                 | Not done            | Not reported       | Not reported  | 1/1 mild flu-like symptoms                    |

|                                           | Patient characteristics                              |                     |                | SARS-CoV-2 test      |                                                      | Skin involvement                     |                     | Laboratory testing |                                                                            |                                                                    |
|-------------------------------------------|------------------------------------------------------|---------------------|----------------|----------------------|------------------------------------------------------|--------------------------------------|---------------------|--------------------|----------------------------------------------------------------------------|--------------------------------------------------------------------|
| Source article                            | Number with pernio, n/N                              | Age, years          | Sex, M, F, n/N | Naso-pharynx PCR n/N | Serum Antibody n/N                                   | Sites, n/N                           | Biopsy results, n/N | Positive, n/N      | Negative, n/N                                                              | Severity of COVID-19 symptoms, n/N                                 |
| <b>Daneshjou et al,<sup>63</sup> 2020</b> | 7/7                                                  | 33,39, 31,44, 31,25 | 4/7 M<br>3/7 F | 0/5 positive         | 1/6 positive                                         | 7/7 toes<br><br>1/7 toes and fingers | Not done            | 0/6                | 6/6 with no coagulation or rheumatologic abnormalities                     | 3/6 mild symptoms<br><br>3/6 asymptomatic                          |
| <b>Baeck et al,<sup>64</sup> 2020</b>     | 54/54 (23 additional pernio, 31 reported previously) | Not reported        | Not reported   | 1/47 positive        | 2/54 positive<br><br>0/39 positive on repeat testing | Toes and/or fingers                  | Not reported        | Not reported       | Other systemic causes of chilblains excluded in the 23 additional patients | More than 50% with mild symptoms (flu-like) prior the skin lesions |

|                                              | Patient characteristics                                     |              |                    | SARS-CoV-2 test      |                                                                              | Skin involvement                                           |                     | Laboratory testing |               |                                    |
|----------------------------------------------|-------------------------------------------------------------|--------------|--------------------|----------------------|------------------------------------------------------------------------------|------------------------------------------------------------|---------------------|--------------------|---------------|------------------------------------|
| Source article                               | Number with pernio, n/N                                     | Age, years   | Sex, M, F, n/N     | Naso-pharynx PCR n/N | Serum Antibody n/N                                                           | Sites, n/N                                                 | Biopsy results, n/N | Positive, n/N      | Negative, n/N | Severity of COVID-19 symptoms, n/N |
| <b>Recalcati et al,<sup>65</sup> 2020</b>    | 32/32 (18 additional pernio, 14 pernio previously reported) | Average 16.3 | 17/32 M<br>15/32 F | 2/11 positive        | 0/22 positive with chemiluminescent immunoassay for IgG<br>3/22 positive IgM | 10/32 feet and hands<br>15/32 feet only<br>7/32 hands only | Not done            | Not reported       | Not reported  | 12/32 with mild symptoms           |
| <b>Rosés-Gibert et al,<sup>66</sup> 2020</b> | 36/36                                                       | Mean 11.1    | 23/36 M<br>13/36 F | 0/7 positive         | 0/1 positive                                                                 | 34/36 feet only<br>1/36 hands and feet<br>1/36 hands only  | Not done            | Not done           | Not done      | 11/36 with mild viral symptoms     |

| Source article                                   | Patient characteristics                     |              |                | SARS-CoV-2 test      |                    | Skin involvement |                        | Laboratory testing |               | Severity of COVID-19 symptoms, n/N        |
|--------------------------------------------------|---------------------------------------------|--------------|----------------|----------------------|--------------------|------------------|------------------------|--------------------|---------------|-------------------------------------------|
|                                                  | Number with pernio, n/N                     | Age, years   | Sex, M, F, n/N | Naso-pharynx PCR n/N | Serum Antibody n/N | Sites, n/N       | Biopsy results, n/N    | Positive, n/N      | Negative, n/N |                                           |
| <b>Ludzik et al,<sup>67</sup> 2020</b>           | 1/1                                         | 48           | 1/1 F          | 0/1 positive         | 0/1 positive       | 1/1 toes         | Consistent with pernio | Not reported       | Not reported  | 1/1 with mild respiratory and GI symptoms |
| <b>Freeman, McMahon et al,<sup>68</sup> 2020</b> | 534 pernio /906 dermatologic manifestations | Not reported | Not reported   | 23/157 positive      | 12/75 positive     | Not reported     | Not reported           | Not reported       | Not reported  | Not reported                              |

|                                            | Patient characteristics                                     |             |                   | SARS-CoV-2 test      |                                                                                                                                                             | Skin involvement |                           | Laboratory testing        |                           |                                    |
|--------------------------------------------|-------------------------------------------------------------|-------------|-------------------|----------------------|-------------------------------------------------------------------------------------------------------------------------------------------------------------|------------------|---------------------------|---------------------------|---------------------------|------------------------------------|
| Source article                             | Number with pernio, n/N                                     | Age, years  | Sex, M, F, n/N    | Naso-pharynx PCR n/N | Serum Antibody n/N                                                                                                                                          | Sites, n/N       | Biopsy results, n/N       | Positive, n/N             | Negative, n/N             | Severity of COVID-19 symptoms, n/N |
| <b>Diociaiuti et al,<sup>69</sup> 2020</b> | 30/30 (13 additional pernio, 17 pernio previously reported) | Range 12-17 | 21/30 M<br>9/30 F | 1/30 positive        | 5/30 IgG positive (4/30 initial test positive, 1/17 second test positive)<br><br>16/30 IgA positive (11/30 initial test positive 8/17 second test positive) | 30/30 toes       | Not reported in new group | Not reported in new group | Not reported in new group | 7/30 mild viral symptoms           |

|                                          | Patient characteristics             |                                  |                        | SARS-CoV-2 test      |                             | Skin involvement                                                   |                     | Laboratory testing                                                                            |                                                   |                                                       |
|------------------------------------------|-------------------------------------|----------------------------------|------------------------|----------------------|-----------------------------|--------------------------------------------------------------------|---------------------|-----------------------------------------------------------------------------------------------|---------------------------------------------------|-------------------------------------------------------|
| Source article                           | Number with pernio, n/N             | Age, years                       | Sex, M, F, n/N         | Naso-pharynx PCR n/N | Serum Antibody n/N          | Sites, n/N                                                         | Biopsy results, n/N | Positive, n/N                                                                                 | Negative, n/N                                     | Severity of COVID-19 symptoms, n/N                    |
| <b>Docampo-Simón,<sup>70</sup> 2020</b>  | 59/59<br><br>17 previously reported | Median 14                        | 34/59 M<br><br>25/59 F | 0/37 positive        | 0/25 positive               | 6/59 hands only<br><br>43/59 feet only<br><br>10/59 hands and feet | Not done            | Not reported                                                                                  | 19/19 parvovirus B19 negative                     | 45/54 asymptomatic<br><br>9/54 with viral symptoms    |
| <b>Gallizzi et al,<sup>71</sup> 2020</b> | 9/9                                 | 5, 8, 11, 11, 12, 13, 14, 14, 15 | 4/9 M<br><br>5/9 F     | 0/9 positive         | 0/9<br><br>1 borderline IgM | 3/9 hands<br><br>6/9 feet                                          | Not done            | 3/9 mildly increased D-Dimer<br><br>4/9 positive ANA<br><br>3/9 IgM antiphospholipid antibody | 9/9 normal immunoglobulin, complement levels, ESR | 3/9 asymptomatic<br><br>6/9 mild respiratory symptoms |

|                                            | Patient characteristics                                                        |            |                        | SARS-CoV-2 test      |                            | Skin involvement |                                                                                                                 | Laboratory testing                                                   |               |                                                            |
|--------------------------------------------|--------------------------------------------------------------------------------|------------|------------------------|----------------------|----------------------------|------------------|-----------------------------------------------------------------------------------------------------------------|----------------------------------------------------------------------|---------------|------------------------------------------------------------|
| Source article                             | Number with pernio, n/N                                                        | Age, years | Sex, M, F, n/N         | Naso-pharynx PCR n/N | Serum Antibody n/N         | Sites, n/N       | Biopsy results, n/N                                                                                             | Positive, n/N                                                        | Negative, n/N | Severity of COVID-19 symptoms, n/N                         |
| <b>Maestro et al,<sup>72</sup> 2020</b>    | 6 pseudo-chilblain/75 hospitalized patients with laboratory confirmed COVID-19 | Mean 67.5  | 48/75 M<br><br>27/75 F | Not specified        | Not specified              | Feet             | Not reported                                                                                                    | Not reported                                                         | Not reported  | All patients admitted to hospital, but not ICU             |
| <b>Gambichler et al,<sup>73</sup> 2020</b> | 1/1                                                                            | 80         | 1/1 F                  | 1/1 positive         | 1/1 positive (IgG and IgA) | 1/1 thumb        | Consistent with pernio<br><br>1/1 positive eccrine and endothelial staining for SARS-CoV-2 spike protein by IHC | Increased leukocyte count, CRP, and ferritin<br><br>Decreased sodium | Not reported  | 1/1 admitted with pneumonia, discharged with full recovery |

|                                          | Patient characteristics    |               |                             | SARS-CoV-2 test                |                          | Skin involvement                                                                 |                                              | Laboratory testing                                                                                                       |                                                                        |                                                            |
|------------------------------------------|----------------------------|---------------|-----------------------------|--------------------------------|--------------------------|----------------------------------------------------------------------------------|----------------------------------------------|--------------------------------------------------------------------------------------------------------------------------|------------------------------------------------------------------------|------------------------------------------------------------|
| Source article                           | Number with<br>pernio, n/N | Age,<br>years | Sex,<br>M, F,<br>n/N        | Naso-<br>pharynx<br>PCR<br>n/N | Serum<br>Antibody<br>n/N | Sites,<br>n/N                                                                    | Biopsy<br>results,<br>n/N                    | Positive,<br>n/N                                                                                                         | Negative,<br>n/N                                                       | Severity of<br>COVID-19<br>symptoms,<br>n/N                |
|                                          |                            |               |                             |                                |                          |                                                                                  | 1/1<br>positive<br>PCR for<br>SARS-<br>CoV-2 |                                                                                                                          |                                                                        |                                                            |
| <b>Fertitta et al,<sup>74</sup> 2020</b> | 17/30                      | Mean<br>11.2  | 10/17<br>M<br><br>7/17<br>F | 0/3<br>positive                | 1/16<br>positive         | 14/17<br>feet only<br><br>2/17<br>hands<br>only<br><br>1/17<br>hands<br>and feet | Not done                                     | 1/16<br>leukocyto-<br>sis<br><br>1/16<br>elevated<br>CRP<br><br>3/16<br>elevated<br>aPTT<br><br>11/14<br>positive<br>ANA | 16/16<br>fibrinogen,<br>D-Dimer,<br>lymphocyte<br>count,<br>hemoglobin | 7/7<br>asymptomatic<br><br>10/17 mild<br>viral<br>symptoms |



|                | Patient characteristics |            |                | SARS-CoV-2 test      |                    | Skin involvement |                     | Laboratory testing                        |               |                                    |
|----------------|-------------------------|------------|----------------|----------------------|--------------------|------------------|---------------------|-------------------------------------------|---------------|------------------------------------|
| Source article | Number with pernio, n/N | Age, years | Sex, M, F, n/N | Naso-pharynx PCR n/N | Serum Antibody n/N | Sites, n/N       | Biopsy results, n/N | Positive, n/N                             | Negative, n/N | Severity of COVID-19 symptoms, n/N |
|                |                         |            |                |                      |                    |                  |                     | 1/12 positive antiphospholipid antibodies |               |                                    |
|                |                         |            |                |                      |                    |                  |                     | 2/15 positive C-ANCA                      |               |                                    |
|                |                         |            |                |                      |                    |                  |                     | 1/9 low CH50                              |               |                                    |
|                |                         |            |                |                      |                    |                  |                     | 10/10 IFN $\gamma$ assay                  |               |                                    |

|                                                 | Patient characteristics |            |                          | SARS-CoV-2 test      |                                                             | Skin involvement                                                                          |                                                                                                                   | Laboratory testing                                        |                               |                                           |
|-------------------------------------------------|-------------------------|------------|--------------------------|----------------------|-------------------------------------------------------------|-------------------------------------------------------------------------------------------|-------------------------------------------------------------------------------------------------------------------|-----------------------------------------------------------|-------------------------------|-------------------------------------------|
| Source article                                  | Number with pernio, n/N | Age, years | Sex, M, F, n/N           | Naso-pharynx PCR n/N | Serum Antibody n/N                                          | Sites, n/N                                                                                | Biopsy results, n/N                                                                                               | Positive, n/N                                             | Negative, n/N                 | Severity of COVID-19 symptoms, n/N        |
| <b>Fabbrocini et al,<sup>75</sup> 2020</b>      | 15/15                   | Mean 13    | 9/15 male<br>6/15 female | 0/15 positive        | Not done                                                    | 15/15 toes<br>4/15 heels                                                                  | Not done                                                                                                          | 1/15 positive anti-EBV IgM                                | No other alterations reported | 9/15 asymptomatic<br>6/15 mild symptoms   |
| <b>Feito-Rodríguez et al,<sup>76</sup> 2020</b> | 37/37                   | Mean 22    | 17/37 M<br>10/37 F       | 3/37 positive        | 3/37 positive serology<br>3/3 positive antigen recall assay | 15/37 toes only<br>10/37 fingers only<br>9/37 toes and feet<br>3/37 fingers and toes/feet | 11/37 consistent with pernio<br>6/11 with C3d and C4d vessel deposition<br>0/3 positive PCR or electron microscop | 5/37 positive anticardiolipin<br>1/24 elevated interferon | Other cytokines normal        | 20/37 asymptomatic<br>17/37 mild symptoms |

|                                                 | Patient characteristics    |               |                              | SARS-CoV-2 test                |                                        | Skin involvement                                                                                                                |                                                                                   | Laboratory testing                                                                                                                |                                                        |                                                                                                                   |
|-------------------------------------------------|----------------------------|---------------|------------------------------|--------------------------------|----------------------------------------|---------------------------------------------------------------------------------------------------------------------------------|-----------------------------------------------------------------------------------|-----------------------------------------------------------------------------------------------------------------------------------|--------------------------------------------------------|-------------------------------------------------------------------------------------------------------------------|
| Source article                                  | Number with<br>pernio, n/N | Age,<br>years | Sex,<br>M, F,<br>n/N         | Naso-<br>pharynx<br>PCR<br>n/N | Serum<br>Antibody<br>n/N               | Sites,<br>n/N                                                                                                                   | Biopsy<br>results,<br>n/N                                                         | Positive,<br>n/N                                                                                                                  | Negative,<br>n/N                                       | Severity of<br>COVID-19<br>symptoms,<br>n/N                                                                       |
|                                                 |                            |               |                              |                                |                                        |                                                                                                                                 | y for<br>SARS-<br>CoV-2                                                           |                                                                                                                                   |                                                        |                                                                                                                   |
| <b>Gómez-Fernández et al,<sup>77</sup> 2020</b> | 54/54 with<br>chilblains   | Mean<br>14    | 31/54<br>M<br><br>23/54<br>F | 0/34<br>positive               | 0/53<br>positive<br>(IgG, IgM,<br>IgA) | 31/54<br>dorsal<br>toes<br><br>8/54<br>heels,<br>soles,<br>lateral<br>feet<br><br>15/54<br>both<br>distributi<br>ons on<br>feet | 10/10<br>consistent<br>with pernio<br><br>7/7 + C3d<br>and C4d<br>vessel<br>walls | 4/54<br>slightly<br>elevated<br>D-dimer<br><br>4/54<br>positive<br>ANA<br><br>4/54<br>anticardio<br>lipin<br><br>4/54 anti-<br>b2 | CBC, PT,<br>aPTT,<br>SPEP, C3,<br>C4, IgM,<br>IgG, IgA | 32/54<br>asymptomatic<br><br>22/54 mild<br>COVID-19<br>symptoms<br>before or after<br>evaluated for<br>chilblains |

|                | Patient characteristics |            |                | SARS-CoV-2 test      |                    | Skin involvement |                     | Laboratory testing                                                                                           |               |                                    |
|----------------|-------------------------|------------|----------------|----------------------|--------------------|------------------|---------------------|--------------------------------------------------------------------------------------------------------------|---------------|------------------------------------|
| Source article | Number with pernio, n/N | Age, years | Sex, M, F, n/N | Naso-pharynx PCR n/N | Serum Antibody n/N | Sites, n/N       | Biopsy results, n/N | Positive, n/N                                                                                                | Negative, n/N | Severity of COVID-19 symptoms, n/N |
|                |                         |            |                |                      |                    | 8/54 on hands    |                     | glycoprotein<br>1/42 lupus anticoagulant<br>1/54 positive ANCA<br>34/51 cryofibrinogens<br>2/47 cryoglobulin |               |                                    |

|                                           | Patient characteristics                               |            |                   | SARS-CoV-2 test      |                    | Skin involvement |                                                                                                                                                                  | Laboratory testing                                                                                    |                                                                                                                |                                                                                                                                                                |
|-------------------------------------------|-------------------------------------------------------|------------|-------------------|----------------------|--------------------|------------------|------------------------------------------------------------------------------------------------------------------------------------------------------------------|-------------------------------------------------------------------------------------------------------|----------------------------------------------------------------------------------------------------------------|----------------------------------------------------------------------------------------------------------------------------------------------------------------|
| Source article                            | Number with pernio, n/N                               | Age, years | Sex, M, F, n/N    | Naso-pharynx PCR n/N | Serum Antibody n/N | Sites, n/N       | Biopsy results, n/N                                                                                                                                              | Positive, n/N                                                                                         | Negative, n/N                                                                                                  | Severity of COVID-19 symptoms, n/N                                                                                                                             |
| <b>Giavedoni et al,<sup>78</sup> 2020</b> | 17 chilblain-like/58 COVID-19-associated skin lesions | Median 29  | 10/17 M<br>7/17 F | 3/13 positive        | 4/15 positive      | Not specified    | 11/12 chilblain-like<br><br>10/11 anti-C9 deposits in dermal vessels<br><br>7/11 direct immunofluorescence with IgM or IgG, C3, and Fibrinogen in dermal vessels | 3/15 positive ANA<br><br>1/15 positive anti-b2 glycoprotein<br><br>2/15 positive for anti-cardiolipin | Median CRP, ferritin, ESR statistically significantly lower in chilblain-like than other COVID-19 skin lesions | 8/17 asymptomatic<br><br>9/17 COVID-19 symptoms<br><br>2/5 with lung infiltrates on chest x-ray<br><br>2/17 hospitalized<br><br>1/17 ICU<br><br>0/17 mortality |

| Source article                         | Patient characteristics                      |            |                  | SARS-CoV-2 test      |                    | Skin involvement          |                                                                                                        | Laboratory testing |                                                                     | Severity of COVID-19 symptoms, n/N                                                            |
|----------------------------------------|----------------------------------------------|------------|------------------|----------------------|--------------------|---------------------------|--------------------------------------------------------------------------------------------------------|--------------------|---------------------------------------------------------------------|-----------------------------------------------------------------------------------------------|
|                                        | Number with pernio, n/N                      | Age, years | Sex, M, F, n/N   | Naso-pharynx PCR n/N | Serum Antibody n/N | Sites, n/N                | Biopsy results, n/N                                                                                    | Positive, n/N      | Negative, n/N                                                       |                                                                                               |
| <b>Sohier et al,<sup>79</sup> 2020</b> | 10 chilblain-like/13 acral cutaneous lesions | Median 32  | 7/13 M<br>6/13 F | 0/13 positive        | Not done           | Not specified             | 10/13 chilblain-like<br><br>8/13 with plasmacytoid dendritic cells<br><br>3/13 thrombotic vasculopathy | None               | White blood cell count, CRP, LDH, ANA, D-dimer, lupus anticoagulant | 4/13 asymptomatic<br><br>9/13 mild symptoms                                                   |
| <b>Rubin et al,<sup>80</sup> 2020</b>  | 1/1 chilblain-like lesions with bullae       | 27         | 1/1 F            | 1/1 positive         | Not done           | 1/1 bilateral dorsal toes | Not done                                                                                               | Not done           | Not done                                                            | 1/1 mild (6 weeks prior toe lesions, patient with ageusia and anosmia, and no other symptoms) |

|                                        | Patient characteristics          |            |                    | SARS-CoV-2 test      |                    | Skin involvement            |                     | Laboratory testing         |                            |                                    |
|----------------------------------------|----------------------------------|------------|--------------------|----------------------|--------------------|-----------------------------|---------------------|----------------------------|----------------------------|------------------------------------|
| Source article                         | Number with pernio, n/N          | Age, years | Sex, M, F, n/N     | Naso-pharynx PCR n/N | Serum Antibody n/N | Sites, n/N                  | Biopsy results, n/N | Positive, n/N              | Negative, n/N              | Severity of COVID-19 symptoms, n/N |
| <b>Pavone et al,<sup>81</sup> 2020</b> | 2/2 chilblains-like lesions      | 7, 11      | 2/2 F              | 2/2 positive         | Not done           | 2/2 toes<br><br>1/2 fingers | Not done            | Not reported               | Not reported               | 2/2 mild respiratory symptoms      |
| <b>Alonso et al,<sup>82</sup> 2020</b> | 5 pseudo-pernio/24 acro-ischemia | Mean 44    | 3/5 M<br><br>2/5 F | 3/5 positive         | 0/1 positive       | Not specified               | Not done            | Not specified for subgroup | Not specified for subgroup | 5/5 with mild viral symptoms       |

|                                         | Patient characteristics    |            |                | SARS-CoV-2 test      |                    | Skin involvement                  |                                                                                                                                                                                      | Laboratory testing |               |                                    |
|-----------------------------------------|----------------------------|------------|----------------|----------------------|--------------------|-----------------------------------|--------------------------------------------------------------------------------------------------------------------------------------------------------------------------------------|--------------------|---------------|------------------------------------|
| Source article                          | Number with pernio, n/N    | Age, years | Sex, M, F, n/N | Naso-pharynx PCR n/N | Serum Antibody n/N | Sites, n/N                        | Biopsy results, n/N                                                                                                                                                                  | Positive, n/N      | Negative, n/N | Severity of COVID-19 symptoms, n/N |
| <b>Aschoff et al,<sup>83</sup> 2020</b> | 3/3 chilblain-like lesions | 19,14,26   | 3/3 M          | 0/3 positive         | 0/3 positive       | 3/3 feet<br>2/3 toes<br>1/3 heels | 3/3 consistent with pernio<br><br>Direct immunofluorescence with IgG, IgM, C3 in small dermal vessels<br><br>myxovirus resistance protein-A+<br><br>phosphorylated janus kinase 1&2+ | 1/3 positive ANA   | Not specified | 1/3 with respiratory symptoms      |



|                                                        | Patient characteristics                                       |            |                    | SARS-CoV-2 test      |                                       | Skin involvement  |                                                                                                                                 | Laboratory testing   |                                    |                                        |
|--------------------------------------------------------|---------------------------------------------------------------|------------|--------------------|----------------------|---------------------------------------|-------------------|---------------------------------------------------------------------------------------------------------------------------------|----------------------|------------------------------------|----------------------------------------|
| Source article                                         | Number with pernio, n/N                                       | Age, years | Sex, M, F, n/N     | Naso-pharynx PCR n/N | Serum Antibody n/N                    | Sites, n/N        | Biopsy results, n/N                                                                                                             | Positive, n/N        | Negative, n/N                      | Severity of COVID-19 symptoms, n/N     |
| <b>Oliva Rodríguez-Pastor et al,<sup>84</sup> 2020</b> | 34 chilblain-type/62 rashes in pediatric emergency department | Mean 11.4  | 20/34 M<br>14/34 F | 0/17 positive        | 4/34 positive<br>1/34 IgM<br>3/34 IgG | Feet and/or hands | Not done                                                                                                                        | Within normal limits | CBC, Fibrinogen, D-Dimer, LDH      | 11/34 with mild symptoms               |
| <b>Olsen et al,<sup>85</sup> 2020</b>                  | 4/4                                                           | Mean 32.5  | 1/4 M<br>3/4 F     | 0/1 positive         | 1/3 positive<br>IgM/IgG               | 4/4 dorsal toes   | Consistent with pernio (lymphocytic vasculitis, eccrine adenitis,<br><br>Predominance of CD3+ T-cells<br><br>Clusters of CD123+ | No abnormalities     | CBC, CMP, coagulation factors, ANA | 4/4 with preceding mild viral symptoms |

|                                       | Patient characteristics |            |                | SARS-CoV-2 test      |                    | Skin involvement                                                   |                              | Laboratory testing                      |                                           |                                    |
|---------------------------------------|-------------------------|------------|----------------|----------------------|--------------------|--------------------------------------------------------------------|------------------------------|-----------------------------------------|-------------------------------------------|------------------------------------|
| Source article                        | Number with pernio, n/N | Age, years | Sex, M, F, n/N | Naso-pharynx PCR n/N | Serum Antibody n/N | Sites, n/N                                                         | Biopsy results, n/N          | Positive, n/N                           | Negative, n/N                             | Severity of COVID-19 symptoms, n/N |
|                                       |                         |            |                |                      |                    |                                                                    | plasmacytoid dendritic cells |                                         |                                           |                                    |
| <b>Rafai et al,<sup>86</sup> 2020</b> | 1/1                     | 17         | 1/1 M          | 0/1 positive         | Not done           | 1/1 Chilblain-like on toes, soles, heels<br><br>targetoid on palms | Not done                     | Slight increase of inflammatory markers | No thrombocytopenia or hypercoagulability | 1/1 mild respiratory infection     |

|                                           | Patient characteristics                                                                                              |                            |                    | SARS-CoV-2 test      |                    | Skin involvement                                                      |                     | Laboratory testing                    |                                       |                                                                                                                                  |
|-------------------------------------------|----------------------------------------------------------------------------------------------------------------------|----------------------------|--------------------|----------------------|--------------------|-----------------------------------------------------------------------|---------------------|---------------------------------------|---------------------------------------|----------------------------------------------------------------------------------------------------------------------------------|
| Source article                            | Number with pernio, n/N                                                                                              | Age, years                 | Sex, M, F, n/N     | Naso-pharynx PCR n/N | Serum Antibody n/N | Sites, n/N                                                            | Biopsy results, n/N | Positive, n/N                         | Negative, n/N                         | Severity of COVID-19 symptoms, n/N                                                                                               |
| <b>Zaladonis et al,<sup>87</sup> 2020</b> | 1/1                                                                                                                  | 20                         | 1/1 M              | 0/1 positive         | Not done           | 1/1 toes                                                              | Not done            | Not reported                          | Not reported                          | Hospitalized for clinical manifestations of COVID-19                                                                             |
| <b>Rekhtman et al,<sup>88</sup> 2020</b>  | 4 pernio-like/35 with a COVID-19-related skin eruption in 296 hospitalized adults + for COVID-19 via PCR or antibody | Median 64 (of 35 patients) | 25/35 M<br>10/35 F | 26/26 positive       | 4/4 positive       | 4/4 hands or feet<br>1/4 hands<br>3/4 fingers<br>1/4 feet<br>2/4 toes | Not done            | Not specified in pernio-like patients | Not specified in pernio-like patients | 35/35 hospitalized for COVID-19<br>27/35 use of vasopressors<br>11/35 dialysis<br>6/35 thrombosis<br>12/35 in-hospital mortality |

|                                     | Patient characteristics                                                              |            |                    | SARS-CoV-2 test      |                    | Skin involvement            |                                                                                                             | Laboratory testing |               |                                            |
|-------------------------------------|--------------------------------------------------------------------------------------|------------|--------------------|----------------------|--------------------|-----------------------------|-------------------------------------------------------------------------------------------------------------|--------------------|---------------|--------------------------------------------|
| Source article                      | Number with pernio, n/N                                                              | Age, years | Sex, M, F, n/N     | Naso-pharynx PCR n/N | Serum Antibody n/N | Sites, n/N                  | Biopsy results, n/N                                                                                         | Positive, n/N      | Negative, n/N | Severity of COVID-19 symptoms, n/N         |
|                                     |                                                                                      |            |                    |                      |                    |                             |                                                                                                             |                    |               |                                            |
| <b>Sun et al,<sup>89</sup> 2020</b> | 2 chilblains/52 with skin rashes of 3128 patients with laboratory-confirmed COVID-19 | Mean 43.2  | 38/52 M<br>14/52 F | Not specified        | Not specified      | 28/52 rashes involving hand | Not specified for pernio<br><br>Viral nucleocapsid protein in epidermal cytoplasm in patients with COVID-19 | Not specified      | Not specified | 12/52 mild or moderate<br><br>40/52 severe |

| Source article                       | Patient characteristics                              |            |                | SARS-CoV-2 test      |                    | Skin involvement |                     | Laboratory testing |               | Severity of COVID-19 symptoms, n/N |
|--------------------------------------|------------------------------------------------------|------------|----------------|----------------------|--------------------|------------------|---------------------|--------------------|---------------|------------------------------------|
|                                      | Number with pernio, n/N                              | Age, years | Sex, M, F, n/N | Naso-pharynx PCR n/N | Serum Antibody n/N | Sites, n/N       | Biopsy results, n/N | Positive, n/N      | Negative, n/N |                                    |
| Diotallevi et al, <sup>90</sup> 2020 | 2 chilblain-like/4 rashes associated with SARS-CoV-2 | 12, 8      | 1/2 M<br>1/2 F | 1/1 positive         | Not done           | 2/2 distal toes  | Not done            | Not done           | Not done      | 2/2 mild                           |

<sup>a</sup>**ANA** = antinuclear antibody; **ANCA** = antineutrophil cytoplasmic antibodies, **aPTT** = activated partial thromboplastin time; **ASO** = antistreptolysin O antibodies, **C3** = complement component 3; **C4** = complement component 4; **CBC** = complete blood count, **CH50** = total complement activity; **CMP** = complete metabolic panel; **COVID-19** = coronavirus disease 2019; **CRP** = C-reactive protein; **dsDNA** = double stranded deoxyribonucleic acid; **EBV** = Epstein-Barr virus; **ESR** = erythrocyte sedimentation rate; **F** = female; **HHV-6** = human herpesvirus 6; **IgA** = immunoglobulin A; **IgG** = immunoglobulin G; **IgM** = immunoglobulin M; **ICU** = intensive care unit; **IHC** = immunohistochemistry; **INR** = international normalized ratio; **ISH** = in situ hybridization; **ENA** = extractable nuclear antibody; **GI** = gastrointestinal; **LDH** = lactate dehydrogenase; **M** = male; **PCR** = polymerase chain reaction; **PT** = prothrombin time; **RF** = rheumatoid factor; **SARS-CoV-2** = severe acute respiratory syndrome coronavirus 2; **SPEP** = serum protein electrophoresis

1. Kolivras A, Dehavay F, Delplace D, et al. Coronavirus (COVID-19) infection-induced chilblains: A case report with histopathologic findings. *JAAD Case Rep.* 2020;6:489-492.
2. Alramthan A, Aldaraji W. Two cases of COVID-19 presenting with a clinical picture resembling chilblains: first report from the Middle East. *Clin Exp Dermatol.* 2020;45:746-748.
3. Estebanez A, Perez-Santiago L, Silva E, Guillen-Climent S, Garcia-Vazquez A, Ramon MD. Cutaneous manifestations in COVID-19: a new contribution. *J Eur Acad Dermatol Venereol.* 2020;34:e250-e251.
4. Romani J, Baselga E, Mitja O, et al. Chilblain and Acral Purpuric Lesions in Spain during Covid Confinement: Retrospective Analysis of 12 Cases. *Actas Dermosifiliogr.* 2020;111:426-429.
5. Landa N, Mendieta-Eckert M, Fonda-Pascual P, Aguirre T. Chilblain-like lesions on feet and hands during the COVID-19 Pandemic. *Int J Dermatol.* 2020;59:739-743.
6. Piccolo V, Neri I, Filippeschi C, et al. Chilblain-like lesions during COVID-19 epidemic: a preliminary study on 63 patients. *J Eur Acad Dermatol Venereol.* 2020;34:e291-e293.
7. Recalcati S, Barbagallo T, Frasin LA, et al. Acral cutaneous lesions in the time of COVID-19. *J Eur Acad Dermatol Venereol.* 2020;34:e346-e347.
8. Fernandez-Nieto D, Jimenez-Cauhe J, Suarez-Valle A, et al. Characterization of acute acral skin lesions in nonhospitalized patients: A case series of 132 patients during the COVID-19 outbreak. *J Am Acad Dermatol.* 2020;83:e61-e63.
9. Docampo-Simon A, Sanchez-Pujol MJ, Juan-Carpena G, et al. Are chilblain-like acral skin lesions really indicative of COVID-19? A prospective study and literature review. *J Eur Acad Dermatol Venereol.* 2020.
10. Galvan Casas C, Catala A, Carretero Hernandez G, et al. Classification of the cutaneous manifestations of COVID-19: a rapid prospective nationwide consensus study in Spain with 375 cases. *Br J Dermatol.* 2020;183:71-77.
11. Andina D, Noguera-Morel L, Bascuas-Arribas M, et al. Chilblains in children in the setting of COVID-19 pandemic. *Pediatr Dermatol.* 2020;37:406-411.
12. Cordoro KM, Reynolds SD, Wattier R, McCalmont TH. Clustered cases of acral perniosis: Clinical features, histopathology, and relationship to COVID-19. *Pediatr Dermatol.* 2020;37:419-423.
13. Freeman EE, McMahan DE, Lipoff JB, et al. Pernio-like skin lesions associated with COVID-19: A case series of 318 patients from 8 countries. *J Am Acad Dermatol.* 2020;83:486-492.
14. de Masson A, Bouaziz JD, Sulimovic L, et al. Chilblains is a common cutaneous finding during the COVID-19 pandemic: A retrospective nationwide study from France. *J Am Acad Dermatol.* 2020;83:667-670.
15. Kanitakis J, Lesort C, Danset M, Jullien D. Chilblain-like acral lesions during the COVID-19 pandemic ("COVID toes"): Histologic, immunofluorescence, and immunohistochemical study of 17 cases. *J Am Acad Dermatol.* 2020;83:870-875.
16. Kerber AA, Soma DB, Youssef MJ. Chilblains-like dermatologic manifestation of COVID-19 diagnosed by serology via multidisciplinary virtual care. *Int J Dermatol.* 2020;59:1024-1025.

17. Locatelli AG, Robustelli Test E, Vezzoli P, et al. Histologic features of long-lasting chilblain-like lesions in a paediatric COVID-19 patient. *J Eur Acad Dermatol Venereol.* 2020;34:e365-e368.
18. Suarez-Valle A, Fernandez-Nieto D, Diaz-Guimaraens B, Dominguez-Santas M, Carretero I, Perez-Garcia B. Acro-ischaemia in hospitalized COVID-19 patients. *J Eur Acad Dermatol Venereol.* 2020.
19. Garcia-Lara G, Linares-Gonzalez L, Rodenas-Herranz T, Ruiz-Villaverde R. Chilblain-like lesions in pediatric dermatological outpatients during the COVID-19 outbreak. *Dermatol Ther.* 2020:e13516.
20. Colonna C, Monzani NA, Rocchi A, Gianotti R, Boggio F, Gelmetti C. Chilblain-like lesions in children following suspected COVID-19 infection. *Pediatr Dermatol.* 2020;37:437-440.
21. Ruggiero G, Arcangeli F, Lotti T, et al. Reply to: "Characterization of acute acro-ischemic lesions in non-hospitalized patients: A case series of 132 patients during the COVID-19 outbreak". *J Am Acad Dermatol.* 2020;83:e237-e239.
22. Mahieu R, Tillard L, Le Guillou-Guillemette H, et al. No antibody response in acral cutaneous manifestations associated with COVID-19? *J Eur Acad Dermatol Venereol.* 2020;34:e546-e548.
23. Guarneri C, Venanzi Rullo E, Gallizi R, Ceccarelli M, Cannavo SP, Nunnari G. Diversity of clinical appearance of cutaneous manifestations in the course of COVID-19. *J Eur Acad Dermatol Venereol.* 2020.
24. El Hachem M, Diociaiuti A, Concato C, et al. A clinical, histopathological and laboratory study of 19 consecutive Italian paediatric patients with chilblain-like lesions: lights and shadows on the relationship with COVID-19 infection. *J Eur Acad Dermatol Venereol.* 2020.
25. Colmenero I, Santonja C, Alonso-Riaño M, et al. SARS-CoV-2 endothelial infection causes COVID-19 chilblains: histopathological, immunohistochemical and ultrastructural study of 7 paediatric cases. *Br J Dermatol.* 2020.
26. Neri I, Viridi A, Corsini I, et al. Major cluster of paediatric 'true' primary chilblains during the COVID-19 pandemic: a consequence of lifestyle changes due to lockdown. *J Eur Acad Dermatol Venereol.* 2020.
27. Colonna C, Spinelli F, Monzani NA, Ceriotti F, Gelmetti C. Chilblains in children in the time of COVID-19: New evidence with serology assay. *Pediatr Dermatol.* 2020;37:1000-1001.
28. Roca-Gines J, Torres-Navarro I, Sanchez-Arreaez J, et al. Assessment of Acute Acral Lesions in a Case Series of Children and Adolescents During the COVID-19 Pandemic. *JAMA Dermatol.* 2020.
29. Herman A, Peeters C, Verroken A, et al. Evaluation of Chilblains as a Manifestation of the COVID-19 Pandemic. *JAMA Dermatol.* 2020.
30. Hubiche T, Le Duff F, Chiaverini C, Giordanengo V, Passeron T. Negative SARS-CoV-2 PCR in patients with chilblain-like lesions. *Lancet Infect Dis.* 2020.
31. Hubiche T, Cardot-Leccia N, Le Duff F, et al. Clinical, Laboratory, and Interferon-Alpha Response Characteristics of Patients With Chilblain-like Lesions During the COVID-19 Pandemic. *JAMA Dermatol.* 2020.
32. Garcia-Legaz Martinez M, Martinez-Domenech A, Magdaleno-Tapiál J, et al. Acute acral cutaneous manifestations during the COVID-19 pandemic: a single-centre experience. *J Eur Acad Dermatol Venereol.* 2020.
33. Santonja C, Heras F, Nunez L, Requena L. COVID-19 chilblain-like lesion: immunohistochemical demonstration of SARS-CoV-2 spike protein in blood vessel endothelium and sweat gland epithelium in a polymerase chain reaction-negative patient. *Br J Dermatol.* 2020;183:778-780.

34. Rouanet J, Lang E, Beltzung F, et al. Recent outbreak of chilblain-like lesions is not directly related to SARS-CoV-2 infection. *J Eur Acad Dermatol Venereol*. 2020.
35. Colonna C, Genovese G, Monzani NA, et al. Outbreak of chilblain-like acral lesions in children in the metropolitan area of Milan, Italy, during the COVID-19 pandemic. *J Am Acad Dermatol*. 2020;83:965-969.
36. Torres-Navarro I, Abril-Perez C, Roca-Gines J, Sanchez-Arreaez J, Botella-Estrada R, Evole-Buselli M. Comment on 'Two cases of COVID-19 presenting with a clinical picture resembling chilblains: first report from the Middle East': pernio unrelated to COVID-19. *Clin Exp Dermatol*. 2020;45:752-754.
37. Lesort C, Kanitakis J, Villani A, et al. COVID-19 and outbreak of chilblains: are they related? *J Eur Acad Dermatol Venereol*. 2020.
38. Rizzoli L, Collini L, Magnano M, et al. Chilblain-like lesions during the COVID-19 pandemic: a serological study on a case series. *Br J Dermatol*. 2020;183:782-784.
39. Das A, Singh V. Erythematous-edematous type of chilblain-like lesions and COVID-19: An Indian perspective. *Dermatol Ther*. 2020:e13912.
40. Valtuena J, Ruiz-Sanchez D, Volo V, Manchado-Lopez P, Garayar-Cantero M. Acral edema during the COVID-19 pandemic. *Int J Dermatol*. 2020;59:1155-1157.
41. Garcia-Gil MF, Monte Serrano J, Garcia Garcia M, et al. Acral purpuric lesions associated with coagulation disorders during the COVID-19 pandemic. *Int J Dermatol*. 2020;59:1151-1152.
42. Wargo JJ, Weir NM, Shamma HN. Coronavirus (COVID-19) Infection-Induced Chilblains: A Brisk Perieccrine Inflammatory Response. *Am J Dermatopathol*. 2020;Publish Ahead of Print.
43. Quintana-Castanedo L, Feito-Rodriguez M, Fernandez-Alcalde C, et al. Concurrent chilblains and retinal vasculitis in a child with COVID-19. *J Eur Acad Dermatol Venereol*. 2020.
44. Battesti G, El Khalifa J, Abdelhedi N, et al. New insights in COVID-19-associated chilblains: A comparative study with chilblain lupus erythematosus. *J Am Acad Dermatol*. 2020;83:1219-1222.
45. Le Cleach L, Dousset L, Assier H, et al. Most chilblains observed during the COVID-19 outbreak occur in patients who are negative for COVID-19 on polymerase chain reaction and serology testing. *Br J Dermatol*. 2020.
46. Freeman EE, McMahon DE, Lipoff JB, et al. The spectrum of COVID-19-associated dermatologic manifestations: An international registry of 716 patients from 31 countries. *J Am Acad Dermatol*. 2020;83:1118-1129.
47. Ladha MA, Dupuis EC. SARS-CoV-2-related chilblains. *CMAJ*. 2020;192:E804.
48. Rodriguez-Villa Lario A, Vega-Diez D, Gonzalez-Canete M, et al. Histological findings in chilblain lupus-like COVID lesions: in search of an answer to understand their aetiology. *J Eur Acad Dermatol Venereol*. 2020;34:e572-e574.
49. Hebert V, Duval-Modeste AB, Joly P, et al. Lack of association between chilblains outbreak and severe acute respiratory syndrome coronavirus 2: Histologic and serologic findings from a new immunoassay. *J Am Acad Dermatol*. 2020;83:1434-1436.
50. Torrelo A, Andina D, Santonja C, et al. Erythema multiforme-like lesions in children and COVID-19. *Pediatr Dermatol*. 2020;37:442-446.



51. Aghazadeh N, Homayouni M, Sartori-Valinotti JC. Oral vesicles and acral erythema: report of a cutaneous manifestation of COVID-19. *Int J Dermatol*. 2020;59:1153-1154.
52. Magro C, Mulvey JJ, Laurence J, et al. The differing pathophysiologies that underlie COVID-19 associated perniosis and thrombotic retiform purpura: a case series. *Br J Dermatol*. 2020.
53. Proietti I, Tolino E, Bernardini N, et al. Auricle perniosis as a manifestation of Covid-19 infection. *Dermatol Ther*. 2020:e14089.
54. Garcia-Gil MF, Garcia Garcia M, Monte Serrano J, Prieto-Torres L, Ara-Martin M. Acral purpuric lesions (erythema multiforme type) associated with thrombotic vasculopathy in a child during the COVID-19 pandemic. *J Eur Acad Dermatol Venereol*. 2020.
55. Caselli D, Chironna M, Loconsole D, et al. No evidence of SARS-CoV-2 infection by polymerase chain reaction or serology in children with pseudo-chilblain. *Br J Dermatol*. 2020;183:784-785.
56. Ko CJ, Harigopal M, Damsky W, et al. Perniosis during the COVID-19 pandemic: Negative anti-SARS-CoV-2 immunohistochemistry in six patients and comparison to perniosis before the emergence of SARS-CoV-2. *J Cutan Pathol*. 2020.
57. Ko CJ, Harigopal M, Gehlhausen JR, Bosenberg M, McNiff JM, Damsky W. Discordant anti-SARS-CoV-2 spike protein and RNA staining in cutaneous pernioic lesions suggests endothelial deposition of cleaved spike protein. *J Cutan Pathol*. 2020.
58. Denina M, Pellegrino F, Morotti F, et al. All that glisters is not COVID: Low prevalence of seroconversion against SARS-CoV-2 in a pediatric cohort of patients with chilblain-like lesions. *J Am Acad Dermatol*. 2020.
59. Pangti R, Gupta S, Nischal N, Trikha A. Recognizable vascular skin manifestations of SARS-CoV-2 (COVID-19) infection are uncommon in patients with darker skin phototypes. *Clin Exp Dermatol*. 2020.
60. Gianotti R, Coggi A, Boggio F, Fellegara G. Similarities in Cutaneous Histopathological Patterns between COVID-19-positive and COVID-19 High-risk Patients with Skin Dermatoses. *Acta Derm Venereol*. 2020;100:adv00249.
61. Stavert R, Meydani-Korb A, de Leon D, Osgood R, Blau J, Luu T. Evaluation of SARS-CoV-2 antibodies in 24 patients presenting with chilblains-like lesions during the COVID-19 pandemic. *J Am Acad Dermatol*. 2020.
62. Mohan V, Lind R. Chilblains in COVID-19 Infection. *Cureus*. 2020;12:e9245.
63. Daneshjou R, Rana J, Dickman M, Yost JM, Chiou A, Ko J. Pernio-like eruption associated with COVID-19 in skin of color. *JAAD Case Rep*. 2020;6:892-897.
64. Baeck M, Peeters C, Herman A. Chilblains and COVID-19: further evidence against a causal association. *J Eur Acad Dermatol Venereol*. 2020.
65. Recalcatti S, Tonolo S, Luzzaro F, Fantini F. Response to "No evidence of SARS-CoV-2 infection by PCR or serology in children with pseudo-chilblain". *Br J Dermatol*. 2020.
66. Roses-Gibert P, Gimeno Castillo J, Saenz Aguirre A, et al. Acral lesions in a pediatric population during the COVID-19 pandemic: a case series of 36 patients from a single hospital in Spain. *World J Pediatr*. 2020.
67. Ludzik J, Witkowski A, Hansel DE, Raess PW, White K, Leachman S. Case Report: Chilblains-like lesions (COVID-19 toes) during the pandemic - is there a diagnostic window? *F1000Res*. 2020;9:668.

68. Freeman EE, McMahon DE, Hruza GJ, et al. Timing of PCR and Antibody Testing in Patients with COVID-19 associated dermatologic manifestations. *J Am Acad Dermatol*. 2020.
69. Diociaiuti A, Giancristoforo S, Terreri S, et al. Are SARS-CoV-2 IgA antibodies in pediatric patients with chilblain-like lesions indicative of COVID-19 asymptomatic or paucisymptomatic infection? *J Eur Acad Dermatol Venereol*. 2020.
70. Docampo-Simon A, Sanchez-Pujol MJ, Gimeno-Gascon A, et al. No SARS-CoV-2 antibody response in 25 patients with pseudo-chilblains. *Dermatol Ther*. 2020:e14332.
71. Gallizzi R, Sutera D, Spagnolo A, et al. Management of pernio-like cutaneous manifestations in children during the outbreak of COVID-19. *Dermatol Ther*. 2020:e14312.
72. Mendez Maestro I, Pena Merino L, Udondo Gonzalez Del Tanago B, et al. Skin manifestations in patients hospitalized with confirmed COVID-19 disease: a cross-sectional study in a tertiary hospital. *Int J Dermatol*. 2020.
73. Gambichler T, Reuther J, Stucker M, et al. SARS-CoV-2 spike protein is present in both endothelial and eccrine cells of a chilblain-like skin lesion. *J Eur Acad Dermatol Venereol*. 2020.
74. Fertitta L, Welfringer A, Ouedrani A, et al. Immunological and virological profile of children with chilblain-like lesions and SARS-CoV-2. *J Eur Acad Dermatol Venereol*. 2020.
75. Fabbrocini G, Vastarella M, Nappa P, et al. A new dermoscopic pattern for Chilblain-COVID-like skin lesion in the adolescent. *JAAD Case Rep*. 2020.
76. Feito-Rodriguez M, Mayor-Ibarguren A, Hijon C, et al. Chilblain-Like Lesions and Covid-19 Infection: A Prospective Observational Study at Spain S Ground Zero. *J Am Acad Dermatol*. 2020.
77. Gómez-Fernández C, López-Sundh AE, González-Vela C, et al. High prevalence of cryofibrinogenemia in patients with chilblains during the COVID-19 outbreak. *International Journal of Dermatology*. 2020.
78. Giavedoni P, Podlipnik S, Pericàs JM, et al. Skin Manifestations in COVID-19: Prevalence and Relationship with Disease Severity. *Journal of Clinical Medicine*. 2020;9:3261.
79. Sohier P, Matar S, Meritet J-F, Laurent-Roussel S, Dupin N, Aractingi S. Histopathological features of Chilblain-like lesions developing in the setting of the COVID-19 pandemic. *Archives of Pathology & Laboratory Medicine*. 2020.
80. Rubin A, Alamgir M, Rubin J, Rao BK. Chilblain-like lesions with prominent bullae in a patient with COVID-19. *BMJ Case Reports*. 2020;13:e237917.
81. Pavone P, Marino S, Marino L, et al. Chilblains-like lesions and SARS-CoV -2 in children: An overview in therapeutic approach. *Dermatologic Therapy*. 2020:e14502.
82. Alonso MN, Mata-Forte T, Garcia-Leon N, et al. Incidence, Characteristics, Laboratory Findings and Outcomes in Acro-Ischemia in COVID-19 Patients. *Vasc Health Risk Manag*. 2020;16:467-478.
83. Aschoff R, Zimmermann N, Beisert S, Gunther C. Type I Interferon Signature in Chilblain-Like Lesions Associated with the COVID-19 Pandemic. *Dermatopathology (Basel)*. 2020;7:57-63.
84. Oliva Rodríguez-Pastor S, Martín Pedraz L, Carazo Gallego B, et al. Skin Manifestations During the COVID-19 Pandemic in the Pediatric Emergency Department. *Pediatrics International*. 2020.
85. Olsen TG, Shrit MA, Feeser TA, Wargo JJ. COVID Purpura (Toes) Case Series: A Chilblains-Like Vasculopathy. *Am J Dermatopathol*. 2020.

86. Rafai M, Elbenaye J, Sabry S, Janah H. Delayed hypersensitivity as a pathophysiological mechanism in cutaneous lesions due to SARS-CoV-2. *Pan Afr Med J.* 2020;35:115.
87. Zaladonis A, Huang S, Hsu S. COVID toes or pernio? *Clinics in Dermatology.* 2020;38:764-767.
88. Rekhtman S, Tannenbaum R, Strunk A, et al. Eruptions and Related Clinical Course Among 296 Hospitalized Adults with Confirmed COVID-19. *Journal of the American Academy of Dermatology.* 2020.
89. Sun Y, Zhou R, Zhang H, et al. Skin is a potential host of SARS-CoV-2: A clinical, single-cell transcriptome-profiling and histologic study. *Journal of the American Academy of Dermatology.* 2020;83:1755-1757.
90. Diotallevi F, Campanati A, Bianchelli T, et al. Skin involvement in SARS-CoV-2 infection: Case series. *Journal of Medical Virology.* 2020;92:2332-2334.
